## Research Article

# Divalent metal cofactors differentially modulate RadA-mediated strand invasion and exchange in *Saccharolobus solfataricus*

Corey J. Knadler, William J. Graham V, Michael L. Rolfsmeier and  Cynthia A. Haseltine

School of Molecular Biosciences, Washington State University, Pullman, Washington 99164-7520, U.S.A.

**Correspondence:** Cynthia Haseltine (chasetline@wsu.edu)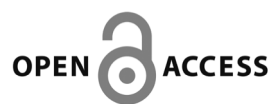

Central to the universal process of recombination, RecA family proteins form nucleoprotein filaments to catalyze production of heteroduplex DNA between substrate ssDNAs and template dsDNAs. ATP binding assists the filament in assuming the necessary conformation for forming heteroduplex DNA, but hydrolysis is not required. ATP hydrolysis has two identified roles which are not universally conserved: promotion of filament dissociation and enhancing flexibility of the filament. In this work, we examine ATP utilization of the RecA family recombinase SsoRadA from *Saccharolobus solfataricus* to determine its function in recombinase-mediated heteroduplex DNA formation. Wild-type SsoRadA protein and two ATPase mutant proteins were evaluated for the effects of three divalent metal cofactors. We found that unlike other archaeal RadA proteins, SsoRadA-mediated strand exchange is not enhanced by  $\text{Ca}^{2+}$ . Instead, the *S. solfataricus* recombinase can utilize  $\text{Mn}^{2+}$  to stimulate strand invasion and reduce ADP-binding stability. Additionally, reduction of SsoRadA ATPase activity by Walker Box mutation or cofactor alteration resulted in a loss of large, complete strand exchange products. Depletion of ADP was found to improve initial strand invasion but also led to a similar loss of large strand exchange events. Our results indicate that overall, SsoRadA is distinct in its use of divalent cofactors but its activity with  $\text{Mn}^{2+}$  shows similarity to human RAD51 protein with  $\text{Ca}^{2+}$ .

## Introduction

Homologous recombination (HR) functions as a potentially error-free method for the repair of DNA double-strand breaks and plays a fundamental role in cell survival and evolution [1–4]. At the center of all HR pathways are the RecA family recombinases (RecA in bacteria, Rad51 in eukaryotes, and RadA in archaea) which catalyze the strand invasion, the homology search, and the formation of heteroduplex DNA [5–7]. The process by which these recombinases perform these actions results from the contributions of several separate activities. Each of these recombinases are capable of ATP-dependent ssDNA binding and form structurally dynamic helical nucleoprotein filaments [8–18]. These nucleoprotein filaments extend ssDNA into a conformation that is competent for homology comparison with dsDNA. RecA filaments randomly bind dsDNA and scan small regions for homology before dissociating if matches are not found [18–21]. For both *Escherichia coli* RecA and *Saccharomyces cerevisiae* Rad51, homology recognition involves short triplet-based sequences of at least nine bases; with *E. coli* RecA, this sampling is expanded to larger triplet-based steps as strand exchange progresses [19,22,23].

While ATPase activity does not appear to be necessary for these processes, the ability to hydrolyze ATP is conserved in all RecA family recombinases identified to date and they all include Walker box ATPase motifs [6,24–29]. The ATPase activities of both *E. coli* RecA and *S. cerevisiae* Rad51 have been shown

Received: 25 August 2022  
Revised: 20 December 2022  
Accepted: 03 January 2023Accepted Manuscript online:  
05 January 2023  
Version of Record published:  
23 February 2023

to improve the selectivity of the homology search during invasion and strand exchange [22,23,30]. Additionally, *E. coli* RecA ATPase activity prevents the accumulation of toxic, non-productive RecA complex formation [30] and hydrolysis-dependent filament cohesion has been observed, where non-contiguous filaments shift by 1–2 nucleotides to be ultimately positioned in phase with each other [31]. Although ATPase activity is unnecessary for strand exchange, it has been shown to promote the process [32–35]. ATPase mediated disassociation from DNA has been reported for *E. coli* RecA, human RAD51, *S. cerevisiae* Rad51, and *S. solfataricus* RadA [18,36–39].

Prevention of dissociation, or increased recombinase-DNA association, is improved by the actions of additional factors that inhibit ATPase activity. For example, recombinase ATPase activity is reduced while DNA association is improved by *S. solfataricus* Ral1 or SsoRadA Walker box mutants, use of ATP analogs with *E. coli* RecA or *S. cerevisiae* Rad51, or replacing  $Mg^{2+}$  with  $Ca^{2+}$  as the divalent cofactor for human RAD51 [20,34,36–38,40]. Still other influences can improve ATPase activity by enhancing DNA binding, such as the presence of low concentrations of DinI protein or use of ATP $\gamma$ S with *E. coli* RecA [41,42]. The complex relationship between DNA binding and recombinase ATPase activity is the result of requisite DNA binding for ATPase activity, while ATPase inhibition reduces dissociation kinetics, ultimately improving binding. Recombinase protein ATPase activity has been universally found to act as a conformational switch that changes both the rigidity and physical geometry of the nucleoprotein filament [18,33,36,43]. The ATP-bound state of *E. coli* RecA, human RAD51, *S. cerevisiae* Rad51, and *S. solfataricus* RadA stretches ssDNA, forming an ordered conformation capable of performing strand exchange [8,9,18,36,44–46]. Hydrolysis of ATP to ADP, or direct binding of ADP, causes *E. coli* RecA and human RAD51 to form shorter, more flexible filaments [18,44–46]. At present, it is unclear whether the mechanistic role played by ATP-induced conformational changes is shared among recombinases.

In addition to ATP binding and hydrolysis, recombinase activities are also dependent on divalent cations. Historically, the biochemical focus has been on  $Mg^{2+}$ , but further investigation of recombinases has revealed that other cations such as  $Ca^{2+}$ , function to modulate their activity [25,33,34,47,48].  $Ca^{2+}$  has been shown to enhance *Methanococcus voltae* and *Methanococcus maripaludis* RadA as well as human RAD51-mediated heteroduplex DNA formation and to inhibit their ATPase activities [25,33,34]. Thus far, the role of alternative cofactors in recombinase protein activity modulation for members of the crenarchaea has been unclear. In this work, we examine the effect of three divalent cations,  $Mg^{2+}$ ,  $Ca^{2+}$ , and  $Mn^{2+}$ , on ATPase activity, strand invasion, and strand exchange mediated by the *S. solfataricus* RadA recombinase protein.

## Materials and methods

### Protein purification

SsoRadA, the K120A and K120R ATPase mutants, and *Thermotoga maritima* pyruvate kinase (*Tm*PK) and *Thermotoga maritima* lactate dehydrogenase (*Tm*LDH) were from laboratory stocks and purified as previously described [38,49]. Except where otherwise noted, SsoRadA was purified in the presence of 1 mM EDTA.

### ATPase assays

ssDNA-dependent ATPase activity for SsoRadA purified in the presence or absence of EDTA was determined using the thermophilic continuous coupled spectrophotometric assay essentially as previously described [50]. All assays were performed at 80°C with a Beckman Coulter DU-800 spectrophotometer fitted with a Peltier device to maintain temperature. Conversion of NADH (Sigma) to NAD was measured at 340 nm. Reactions were performed in a 150  $\mu$ l volume and contained 40 mM HEPES (pH 7.0), 20 mM MgOAc, 300  $\mu$ M NADH, 2 mM phosphoenol pyruvate, 15 U *Tm*LDH, 15 U *Tm*PK, 7  $\mu$ M nucleotide  $\phi$ X174 ssDNA (NEB), 0.5 mM ATP, and used ultrapure deionized water with a resistance of 18.2 megohms. Mixtures were equilibrated at 80°C for 3 min prior to assay initiation by addition of 3  $\mu$ M SsoRadA. All assays were performed a minimum of three times. The extent of ATP hydrolysis was determined by measuring NADH oxidation and its extinction coefficient of 6220  $M^{-1}cm^{-1}$ . Maximal velocities were determined by the 5-min window with the highest change of NADH concentration and averaging ATPase reaction velocity across all points of all replicates during that window. Maximal velocities are reported +/- the standard deviation of velocities within this window.

All other ATPase activity determinations were through use of the thin layer chromatography (TLC) assay essentially as previously described [51] with the following alterations. Reaction mixtures contained 25 mM Tris acetate (pH 7.5), 100  $\mu$ g/ml BSA, 0.5 mM ATP, 5–10  $\mu$ Ci [ $\gamma$ - $^{32}P$ ] ATP, 15  $\mu$ M SsoRadA, 50  $\mu$ M (nucleotides)  $\phi$ X174 virion (NEB), ultrapure deionized water with a resistance of 18.2 megohms, and the indicated cation at 10 mM concentration. Assays were incubated at 65°C for 15 minutes and samples were then applied to PEI cellulose sheets (Analtech) that were pre-run with ddH<sub>2</sub>O. Plates were developed in 3.8% formic acid and 0.25 M LiCl and allowed to air dry. The amount

of ATP hydrolyzed was imaged and analyzed by phosphorimaging using a Storm 850 Phosphorimager (Molecular Dynamics). The Image Quant TL program was used for quantitation and included a minimum of three replicates.

Kinetic parameters for SsoRadA with  $MgCl_2$  were determined by initial velocity measurement of reactions containing 20  $\mu M$  (nucleotides)  $\phi X174$  virion (NEB) and 0.5  $\mu M$  SsoRadA. Additionally, a range of ATP from 0.5 to 150  $\mu M$  ATP was used, depending on the divalent metal cofactor and time of incubation was from 0.5-120 minutes to maintain measurable activity. Reaction yields in  $\mu M$  were divided by incubation duration to calculate initial reaction velocity. Initial rates were calculated by dividing the reaction velocity by SsoRadA protein concentration ( $\mu M$ ). These initial rates were then graphed as a function of initial ATP concentration, with  $k_{cat}$  and  $K_m$  calculated using a non-linear regression of (eqn 1).

$$rate = \frac{k_{cat} * [substrate]}{K_m + [substrate]} \quad (1)$$

$k_{cat}$  was calculated as the rate at the horizontal asymptote and  $K_m$  was set to be the midpoint between 0 and the horizontal asymptote. To determine IC50s for  $Mg^{2+}$  and  $Mn^{2+}$  with respect to ADP and ATP $\gamma$ S inhibition the reaction rate across a range of ATP $\gamma$ S or ADP concentrations was measured and graphed as a non-linear regression of inhibitor concentration versus response (GraphPad 9) [52].

## Filter binding assays

Filter binding was used to determine  $K_D$  values for protein-ATP and protein-ssDNA binding essentially as previously described [38] ATP binding reactions were performed in the absence of ssDNA and contained 40 mM HEPES (pH 7.0), 10 mM  $CaCl_2$ ,  $MgCl_2$ , or  $MnCl_2$ , 50 mM KCl, 20 pmol of SsoRadA, ATP at varying concentrations, and used ultrapure deionized water with a resistance of 18.2 megohms. Reactions to assess ssDNA binding included 3  $\mu M$  ATP and varying concentrations of the 63-mer oligonucleotide 5'-ACAGCACCAATGAAATCTATTAAGCTCCTCATCGTCCGCAAAAATATCGTCACCTCAAAGGA-3' (Sigma Aldrich). Binding curves were determined with a minimum of three replicates where  $K_D$  values as reported in the text were generated using Prism 9 (GraphPad) and error represents the standard deviation.

## Displacement loop assay

Assay substrates were pBR322 plasmid prepared without alkali lysis as previously described [49] and the homologous 101-mer oligonucleotide DLpBR322 5'-TGGCCTGCAACGCGGGCATCCCGATGCCGCGGAAGCGAGAAGAATCATAATGGGGAAGGCCATCCAGCCTCGCGTCCGCAACGCCAGCAAGACGTAGCCC-3' synthesized by Sigma-Aldrich and purified by HPLC. DLpBR322 was 5' end labeled with [ $\gamma$ - $^{32}P$ ] using 10 U of T4 polynucleotide kinase (NEB) and its manufacturer supplied buffer. Labeling was for 1 h at 37°C followed by enzyme heat inactivation at 75°C for 10 min. Assay reactions contained 25 mM Tris acetate (pH 7.5), 10  $\mu g/ml$  BSA, 0.9  $\mu M$  nucleotides DLpBR322, 2 mM ATP, and 0.6  $\mu M$  SsoRadA, K120A, or K120R protein as indicated in the text, and used ultrapure deionized water with a resistance of 18.2 megohms. Samples containing the ATP regeneration system included 10 U of *Tm*PK and 2 mM of phosphoenolpyruvate (Alfa Aesar). Reactions were incubated at 65°C for 5 min after which pBR322 was added to a final concentration of 30  $\mu M$  base pairs and incubation was continued for the times indicated. Assays were stopped by the addition of EDTA and SDS to final concentrations of 25 mM and 1.5% respectively and 0.4 U Proteinase K (NEB), followed by incubation at 65°C for 30 min. About 4  $\mu l$  of loading buffer containing 0.025% bromophenol blue in 30% glycerol was added to each reaction before loading on a vertical 1.5% agarose, 1 $\times$  TAE (40 mM Tris acetate and 2 mM EDTA) gel. Electrophoresis was for 150 min at 75 V. Gels were dried and exposed to a Molecular Dynamics phosphorimaging screen and results were visualized using a Storm 850 phosphorimager. Images were analyzed using Image Quant TL software and results were background adjusted and quantitated relative to the 1-min timepoint for wild-type SsoRadA with  $CaCl_2$ . Product formation for all other conditions were compared to this value and expressed as fold change. All assays were performed with a minimum of three replicates.

## DNA strand exchange reactions

SsoRadA at an 11  $\mu M$  concentration was incubated with  $\phi X174$  ssDNA (NEB) at a concentration of 33  $\mu M$  nucleotides in 30 mM MES (pH 6.5), 5  $\mu g/ml$  BSA, 2.5 mM ATP, and 10 mM of divalent cation as indicated in ultrapure deionized water with a resistance of 18.2 megohms for 5 min at 80°C. Reactions were initiated by the addition of 33  $\mu M$  nucleotides *Pst*I linearized  $\phi X174$  RF1. Following addition of dsDNA, reactions were further incubated at 65°C for the times indicated. Samples that included ATP $\gamma$ S contained the specified amount of the ATP analog in addition to 2.5 mM ATP while those that included the ATP regeneration system also had 2 mM phosphoenolpyruvate and

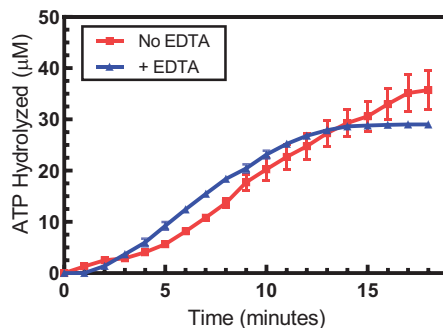

**Figure 1. Protein purification in the presence or absence of EDTA impacts SsoRadA ATPase activity**

ATPase activity of SsoRadA purified in the presence (blue triangles) or absence (red squares) of EDTA was measured using the coupled assay across 1-min timepoints. Reactions included 3  $\mu\text{M}$  SsoRadA and 7  $\mu\text{M}$  ssDNA (nucleotides). Each graphed point represents four replicates and error bars are standard deviation.

3.13 units of *Tm*PK. Assays were stopped by deproteinization by addition of EDTA and SDS to final concentrations of 25 mM and 1.5% respectively and 0.4 U Proteinase K (NEB), followed by incubation at 65°C for 20 min. Reaction products were separated by electrophoresis for 16 h at 30 V on a 1%, 1 $\times$  TAE (40 mM Tris acetate and 2 mM EDTA) agarose gel. Following electrophoresis, gels were washed with 50 mM EDTA for 1 h then with ddH<sub>2</sub>O three times for 20 min each time. The gels were then stained with 0.5  $\mu\text{g}/\text{ml}$  ethidium bromide for 1 h before being photographed using a Syngene GeneFlash system and quantified with Licor Image Lite software. Utilization of the dsDNA substrate and production of nicked circular dsDNA and joint molecule intermediate products were quantified by determining relative band intensities using raw volumes and adjusting for background values and reported as percent yield.

## Graphing and non-linear regression

All graphs were generated using GraphPad Prism 9 and all error bars represent  $\pm$  standard deviation.

## Results

### SsoRadA exhibits differential ATPase activity when purified in the absence of EDTA

In previous work from our lab and others [6,49–51,53], heterologously expressed SsoRadA protein has been purified using buffers containing the chelating agent EDTA, which removes divalent metal cofactors. Controlled concentrations of divalent cofactor, historically  $\text{Mg}^{2+}$ , are then provided in the assay buffer for activity determinations. The effect of removal of the cofactor and/or substitution with another, has not been established for SsoRadA. To investigate the role of divalent cofactors with SsoRadA, we purified the protein in the absence of EDTA and compared ATPase activity with protein purified with the chelator (Figure 1). When EDTA is excluded from the purification protocol, we found that both initiation and diminution of ATPase activity is slowed (red squares), but there is no apparent alteration in maximal hydrolysis velocity, which was observed as  $2.93 \mu\text{M} \cdot \text{min}^{-1} \pm 1.40$  and  $2.94 \mu\text{M} \cdot \text{min}^{-1} \pm 0.49$  for SsoRadA purified without EDTA and with EDTA respectively. Previous reports for SsoRadA as well as other RecA family recombinases including *E. coli* RecA and *S. cerevisiae* Rad51 show no ATP hydrolysis activity in the absence of  $\text{Mg}^{2+}$ , indicating that free ATP is unable to act as a substrate and the presence of a divalent cation is necessary for function [6,7,54]. The observation of differential SsoRadA ATPase activity in Figure 1 raises the question as to whether a divalent metal cofactor (other than  $\text{Mg}^{2+}$ ) remains associated with SsoRadA following heterologous expression that is involved in its function.

### $\text{Mn}^{2+}$ and $\text{Ca}^{2+}$ reduce SsoRadA ATPase activity while only $\text{Ca}^{2+}$ changes ATP binding affinity

Divalent cations such as  $\text{Mg}^{2+}$  are commonly used by recombinases as cofactors for binding and hydrolysis of ATP and substitution of  $\text{Mg}^{2+}$  for  $\text{Ca}^{2+}$  reduces the ATPase activity of *E. coli* RecA, *Methanococcus voltae* RadA, and human RAD51, [20,25,34,47]. Cation dependence has not been broadly examined for members of the crenarchaea, so it is unclear whether  $\text{Ca}^{2+}$  mediated enhancement is a general feature of archaeal recombinases or is instead specific for methanogen recombinases. To further investigate the role of divalent cations for SsoRadA function, we tested the



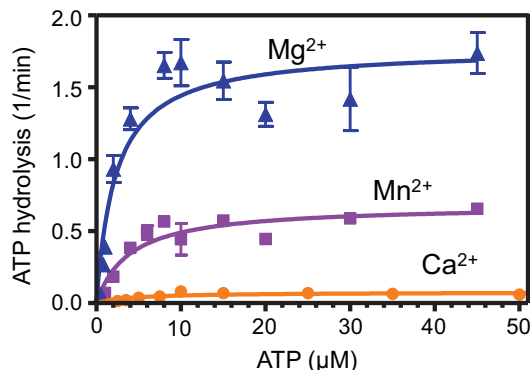

**Figure 2. Different divalent cofactors alter SsoRadA ATPase activity**

Kinetic parameters of SsoRadA ATPase activity were determined by TLC and a range of ATP concentrations in the presence of 20  $\mu\text{M}$  ssDNA and 500 nM protein. Cofactors were added at a concentration of 10 mM where blue triangles are  $\text{Mg}^{2+}$ , orange circles are  $\text{Ca}^{2+}$ , and purple squares are  $\text{Mn}^{2+}$ . Each graphed point represents a minimum of five replicates and lines are the non-linear regression of each dataset using (eqn 1) (experimental procedures). Error bars are standard deviation.

effect of  $\text{Ca}^{2+}$  and  $\text{Mn}^{2+}$  on ATPase activity. Cation concentrations were selected based on SsoRadA activity in the highly sensitive strand exchange reaction [51] and titration experiments. At 10 mM cation concentration, we did not observe strand exchange product limitation and elected to use that amount for cation impact evaluations. Kinetic parameters were first determined in the presence of an excess of DNA. As shown in Figure 2, there is a dramatic effect upon substituting for  $\text{Mg}^{2+}$ . The observed  $K_{\text{cat}}$  with  $\text{Mg}^{2+}$  was  $1.7 \text{ min}^{-1} \pm 0.09$ ,  $\text{Mn}^{2+}$  was  $0.68 \text{ min}^{-1} \pm 0.04$  (2.5-fold lower than with  $\text{Mg}^{2+}$ ), and  $\text{Ca}^{2+}$  was  $0.075 \text{ min}^{-1} \pm 0.005$  (23-fold lower than with  $\text{Mg}^{2+}$ ). Relative to  $\text{Mg}^{2+}$ , the observed  $K_{\text{m}}$  was quite similar for each cofactor with  $2.3 \mu\text{M} \pm 0.47$  for  $\text{Mg}^{2+}$ ,  $3.9 \mu\text{M} \pm 0.84$  for  $\text{Mn}^{2+}$ , and  $4.3 \mu\text{M} \pm 1.2$  for  $\text{Ca}^{2+}$ . We additionally measured the  $K_{\text{D}}$  of SsoRadA-ATP binding in the presence of each cofactor using a filter binding assay. Observed  $K_{\text{D}}$  values for SsoRadA-ATP binding were  $1.6 \mu\text{M} \pm 0.44$  and  $1.13 \mu\text{M} \pm 0.44$  for  $\text{Mn}^{2+}$  and  $\text{Mg}^{2+}$ , respectively ( $\pm$ standard deviation), indicating that these cofactors have a minor effect on ATP binding. The  $K_{\text{D}}$  for SsoRadA-ATP binding with  $\text{Ca}^{2+}$  was above  $800 \mu\text{M}$ , and therefore too high to be accurately determined. Taken together, the substantial difference between the observed  $K_{\text{m}}$  and  $K_{\text{D}}$  for SsoRadA in the presence of  $\text{Ca}^{2+}$  suggests that this cofactor destabilizes the association between SsoRadA and ATP.

## $\text{Ca}^{2+}$ and $\text{Mn}^{2+}$ both enhance SsoRadA-mediated strand invasion

To further understand the impact of cations on SsoRadA function, we next investigated recombinase-mediated strand invasion using a displacement or D-loop assay. In this assay, the ability of the recombinase to form a nucleoprotein filament on ssDNA that can invade a homologous double-stranded circular plasmid is measured and invasion product yield and kinetics can be determined. We tested SsoRadA invasion activity with each of the divalent cations both with and without the inclusion of an ATP regeneration system, which maintains a high ATP:ADP ratio. Relative to  $\text{Mg}^{2+}$  in the absence of the regeneration system, inclusion of either  $\text{Ca}^{2+}$  or  $\text{Mn}^{2+}$  significantly increases strand invasion yield (Figure 3, compare C and D). In the case of  $\text{Ca}^{2+}$ , this increase is apparent after 30 min of incubation and is close to 25-fold after 90 min. For  $\text{Mn}^{2+}$ , there is an initial strong increase in invasion up to about 40-fold which is highly reduced as incubation continues. The characteristic D-loop cycle [38,55] is apparent for SsoRadA with both  $\text{Mn}^{2+}$  and  $\text{Mg}^{2+}$  where an initial burst of product formation is followed by a reduction at later time-points (Figure 3C,D, purple and blue bars). When  $\text{Ca}^{2+}$  was used, however, maximum yield was achieved at the latest time point and no significant dissociation was apparent (Figure 3C, orange bars). These results suggest that the increased yield of invasion products in the presence of  $\text{Mn}^{2+}$  is likely the result of increased strand invasion activity while increased yield in the presence of  $\text{Ca}^{2+}$  could be due to D-loop dissociation failure, increased strand invasion activity, and/or persistence of strand invasion activity over time. When the ATP regeneration system was included, substantial enhancement of SsoRadA-mediated strand invasion was observed with  $\text{Mg}^{2+}$  (Figure 3D) indicating that the ATP-bound state is necessary for strand invasion. This result is consistent with previous reports for *E. coli* RecA, human Rad51, and archaeal RadA recombinases [56–58]. For reactions containing either  $\text{Ca}^{2+}$  or  $\text{Mn}^{2+}$  there was a smaller effect, suggesting that these cofactors reduce either SsoRadA affinity for ADP, changing the stability of the ADP-bound SsoRadA-ssDNA nucleoprotein filament, or alternatively permit SsoRadA to initiate strand invasion while ADP is bound (Figure 3C).

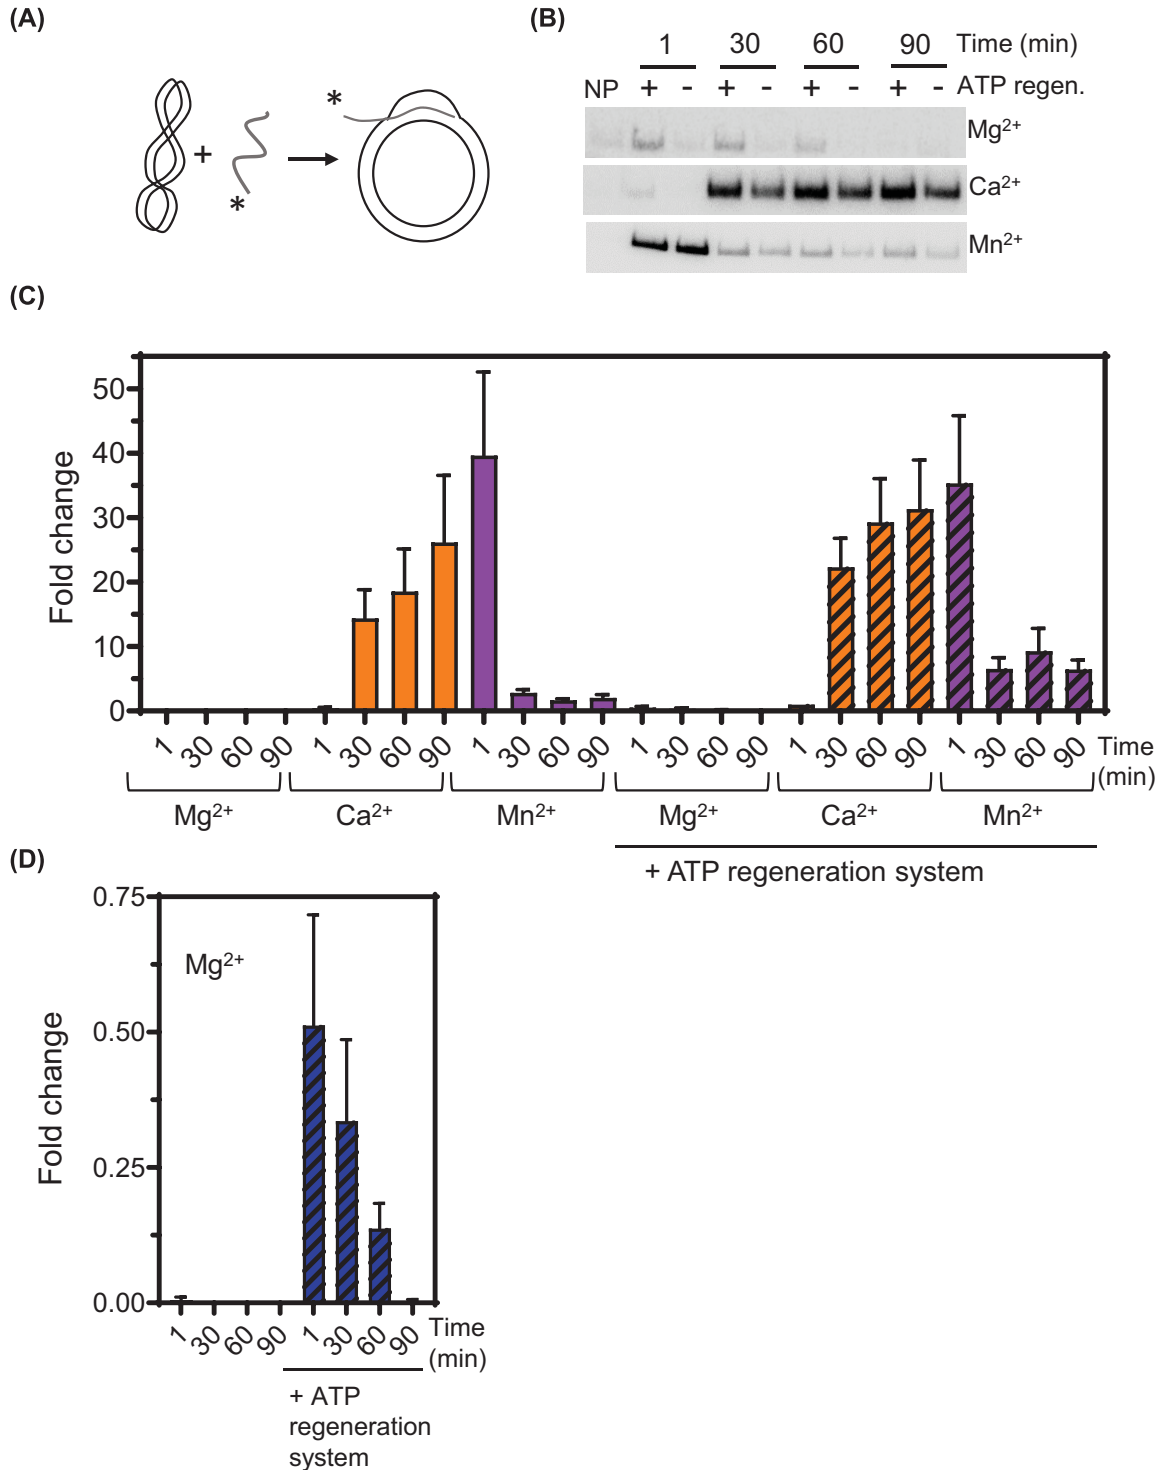

**Figure 3. D-loop formation mediated by WT SsoRadA in the presence of different divalent cations**

(A) Schematic of the D-loop reaction. (B) Representative autoradiographs showing the final invasion product for reactions in the presence of Mg<sup>2+</sup>, Ca<sup>2+</sup>, or Mn<sup>2+</sup>, and with or without an ATP regeneration system. (C and D) Quantitation of D-loop formation time courses. Reactions including the ATP regeneration system are indicated along the x-axis. Results are expressed as fold increase relative to WT SsoRadA with Ca<sup>2+</sup> and ATP regeneration at the 1-min time point. Results shown in (D) are identical to those for WT SsoRadA data (C) in the presence of Mg<sup>2+</sup>, but with reduced y-axis compression to show fold change. For panels (C and D) bars with crosshatch patterning represent reactions that include the ATP regeneration system. All data are the averages of at least three reactions and error bars are  $\pm$  standard deviation.

## SsoRadA Walker box ATPase mutant strand invasion activity is differentially altered

As there was an apparent effect on SsoRadA invasion activity dependent on high ATP:ADP ratio, we next examined mutations in the Walker A ATPase domain. The Walker A domain is one of two conserved motifs that are components of the nucleotide-binding site of ATP hydrolyzing proteins [59]. The lysine residue in the GKT/S of the A box contacts the  $\gamma$ -phosphate of ATP and is essential for binding [60]. We previously constructed two Walker A ATPase mutants for SsoRadA [38]. In these mutants, the conserved lysine residue located at position 120 has been altered to either an alanine (K120A) or an arginine (K120R). Examining strand invasion activity for these altered proteins in this work, we determined that when  $Mg^{2+}$  is used as a cofactor, both mutants can catalyze strand invasion. The K120A protein-mediated strand invasion products appeared slowly relative to those of the K120R mutant. Changing the divalent cofactor from  $Mg^{2+}$  to either  $Mn^{2+}$  or  $Ca^{2+}$  resulted in a clear alteration in strand invasion activities. As shown in Figure 4, the K120R mutant with  $Mn^{2+}$  displayed the highest yield, producing invasion products at a level close to 20-fold higher than with either  $Mg^{2+}$  or  $Ca^{2+}$  (panel B, compare solid purple bars to blue and orange bars). D-loop invasion products in the presence of  $Mn^{2+}$  were formed rapidly and no significant changes of invasion product levels were observed over time. Conversely, use of either  $Mg^{2+}$  or  $Ca^{2+}$  resulted in invasion product accumulation at later time points. Inclusion of the ATP regeneration system had little effect on maximal invasion product yield in any case except at the 90-min time point with  $Ca^{2+}$ , where levels were reduced relative to those produced at a higher ATP:ADP ratio (Figure 4B, compare orange solid bars to cross-hatched bars). With the K120A mutant, use of  $Mg^{2+}$  resulted in invasion product levels comparable to those seen with K120R (Figure 4C). When the ATP regeneration system was included, however, maximal D-loop formation was increased by approximately 10-fold (Figure 4C, compare blue solid bars to cross-hatched bars). An increased ATP:ADP ratio resulted in a modest increase invasion product formation by the K120A mutant when  $Mn^{2+}$  was present (Figure 4C, purple cross-hatched bars). Reactions containing  $Ca^{2+}$  and the ATP regeneration system showed a higher overall increase in invasion relative to those without higher levels of ATP (Figure 4C, compare orange solid bars to cross-hatched bars).

Interestingly, the slow formation of strand invasion products and apparent absence of net dissociation of D-loops observed in several of the reactions with ATPase mutant protein reflects the activity of wild-type SsoRadA in the presence of  $Ca^{2+}$ . In this case, D-loops also form slowly without measurable dissociation. This result is contrary to observed invasion product disassociation with wild-type SsoRadA with either  $Mg^{2+}$  or  $Mn^{2+}$ . D-loop disassociation with these cofactors could indicate that SsoRadA protein fails to remain strand invasion competent after completion of the reaction, as has been previously reported for RecA protein [55]. The lack of apparent invasion product dissociation with wild-type RadA in the presence of  $Ca^{2+}$  and by both mutants with all cations tested suggests that strand invasion activity is maintained at later time points in the reaction or that D-loops have become more stable.

## $Ca^{2+}$ and $Mn^{2+}$ reduce SsoRadA-mediated strand exchange

To determine the impact of alternate divalent cations on the strand exchange function, we used an established *in vitro* assay with plasmid-length homologous substrates [51,61]. With this assay both strand-invaded intermediates (joint molecules) and fully exchanged products (nicked circular) can be directly visualized on an agarose gel (Figure 5, panels A and B). The highest yield of nicked circular product was observed in reactions containing  $Mg^{2+}$ , with an approximately 50% reduction in yield with  $Ca^{2+}$ ; activity with  $Mn^{2+}$  was less than 20% of that with  $Mg^{2+}$  (Figure 5C, top panel). Additionally, use of  $Mg^{2+}$  resulted in accumulation of nicked circular DNA over time while  $Ca^{2+}$  led to cessation of product formation after the first 15 minutes (Figure 5C, top panel, compare orange circles to blue triangles). When either  $Mg^{2+}$  or  $Ca^{2+}$  were provided, joint molecule yields produced by SsoRadA were similar but substituting  $Mn^{2+}$  resulted in fewer joint molecules and delayed intermediate formation (Figure 5D, top panel). The overall abrogation of joint molecule formation and strand exchange with  $Mn^{2+}$  was unexpected, since  $Mn^{2+}$  had only a mild effect on SsoRadA ATPase activity and enhanced recombinase-mediated strand invasion (Figures 2 and 3C, compare purple to blue). This result suggests that SsoRadA-produced heteroduplex DNAs in short, D-loop level sizes could have different cofactor or stability requirements than those necessary for generation of larger, multi-kilobase strand exchange products.

We also tested the effect of increasing levels of ATP available during strand exchange by including the regeneration system and with the three divalent cofactors (Figure 5C,D, bottom panels). Joint molecule formation was altered significantly for reactions containing  $Mg^{2+}$ , which showed earlier formation and higher overall production. Both  $Ca^{2+}$  and  $Mn^{2+}$  also showed increased joint molecule formation, although levels were not as high as those observed for  $Mg^{2+}$ . Production of completed nicked circular DNAs, however, was reduced for  $Ca^{2+}$  and  $Mg^{2+}$  when compared with reactions that did not have the ATP regeneration system. This may indicate that SsoRadA fails to complete the

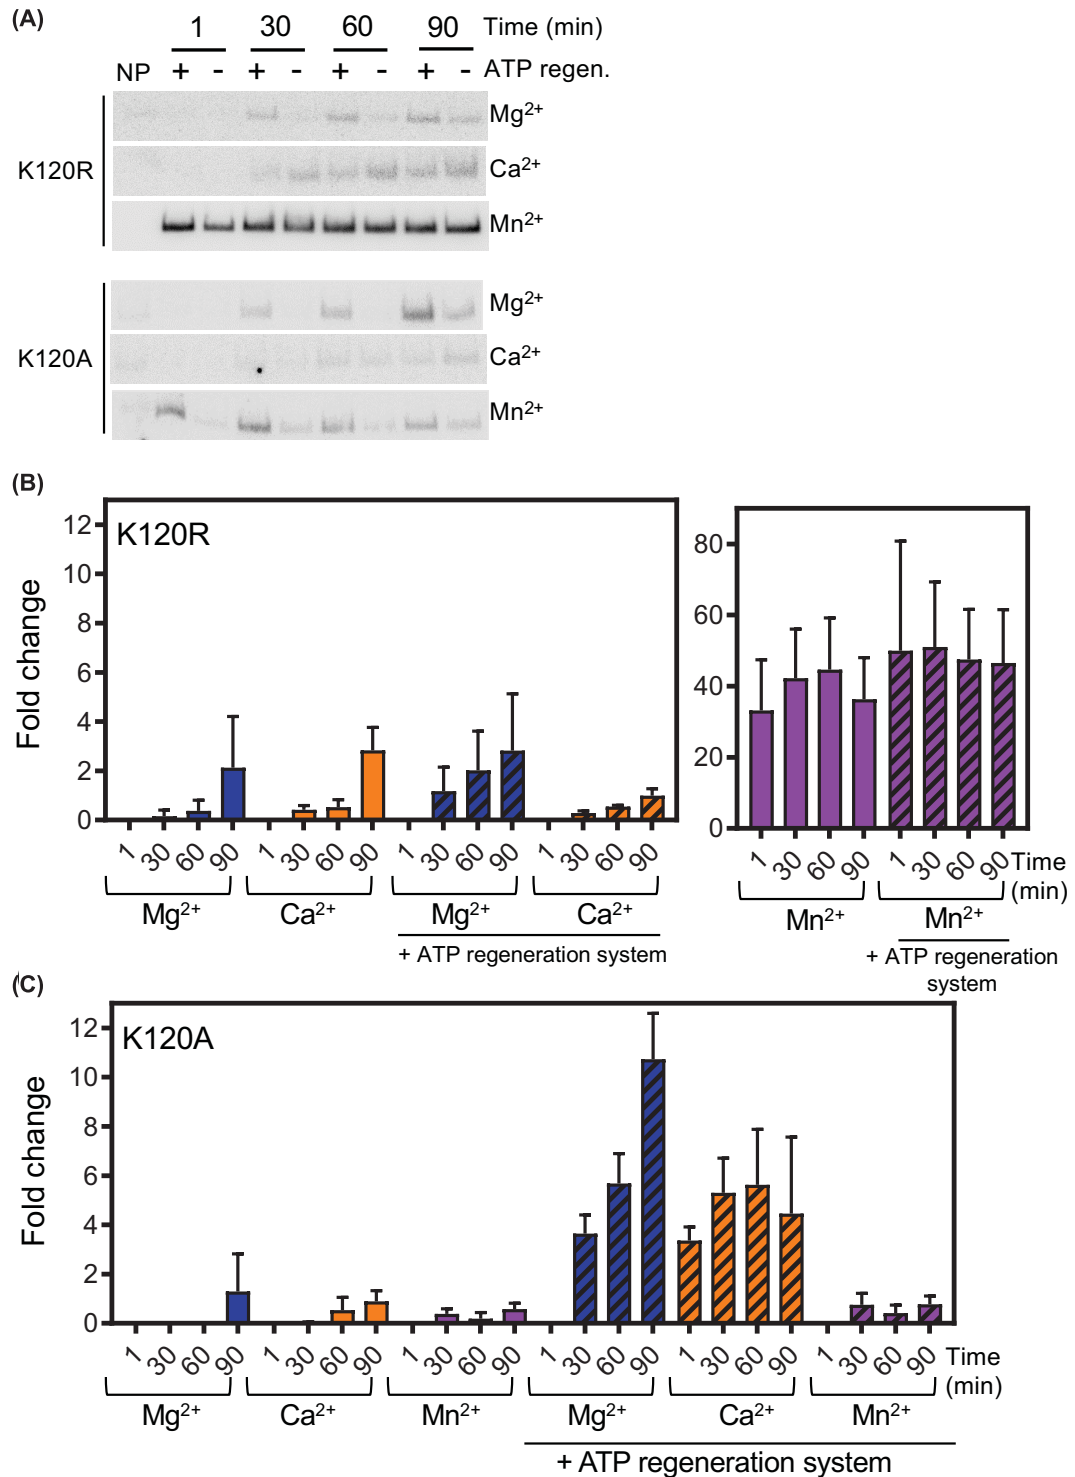

**Figure 4. RadA ATPase mutants display altered responses to different cofactors**

(A) Representative autoradiographs of D-loop time courses. Divalent cations tested are indicated, as is the presence/absence of the ATP regeneration system. Invasion products for each condition were measured at 1-, 30-, 60-, and 90-min time points. (B) D-loop formation quantitation for the K120R mutant protein. Mn<sup>2+</sup> data are shown in a separate panel from Mg<sup>2+</sup> and Ca<sup>2+</sup> to highlight variations. (C) D-loop formation quantitation for the K120A mutant protein. For all data points shown in panels (B and C), a minimum of three replicates were used. Results are expressed as fold increase relative to WT SsoRadA with Ca<sup>2+</sup> and ATP regeneration at the 1-minute time point. For panels (B and C) bars with crosshatch patterning are reactions that include the ATP regeneration system. Error bars represent standard deviation in all cases.



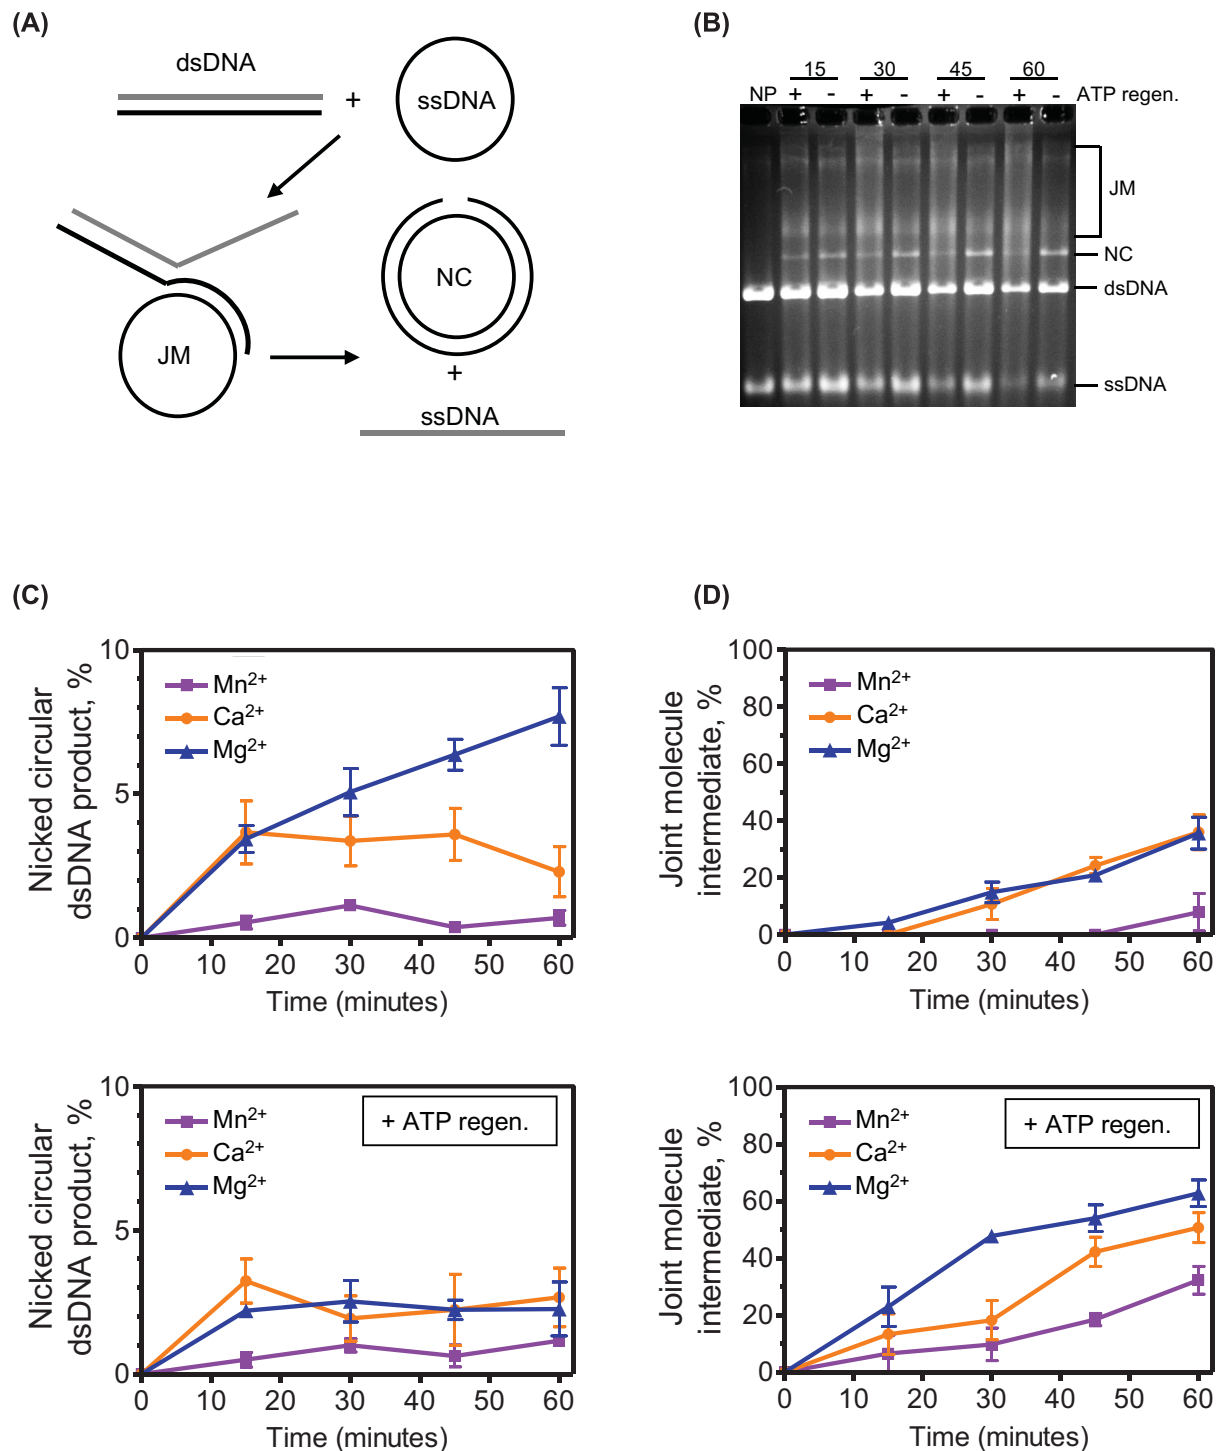

**Figure 5. Ca<sup>2+</sup> and Mn<sup>2+</sup> reduce SsoRadA-mediated strand exchange**

(A) Schematic of the strand exchange reaction with input ss-DNA, dsDNA, intermediate joint molecule (JM), and final nicked circular (NC) products illustrated. (B) Representative gel indicating the presence or absence and duration of reactions above the gel for assays performed with Mg<sup>2+</sup> as the cation. NP indicates a reaction where no protein was added. The panels in (C) show the yield of JM product as a percentage of total DNA and NC product as a percentage of total DNA in the panels in (D). For all reactions, SsoRadA was used at a stoichiometry of 1:3 (nucleotides). Blue triangles indicate the use of Mg<sup>2+</sup>, orange circles show Ca<sup>2+</sup>, and Mn<sup>2+</sup> is represented with purple squares. All graphed data points are the averages of a minimum of three replicates and error bars represent ± standard error.

exchange reaction when ATP is in abundance and that the DNA molecules are caught at the strand invasion step. The ATP:ADP ratio may be important for completion of strand invasion with larger substrates, as inclusion of the ATP regeneration system increases the persistence of joint molecules with all the tested cofactors. This suggests that completion of the exchange process could be more efficient with the ADP-bound state of SsoRadA.

## Altering the ATP:ADP ratio depresses K120A mutant strand invasion and exchange with Mg<sup>2+</sup>

As levels of available ATP have an apparent impact on the overall strand exchange process, we turned to the Walker A box K120A and K120R SsoRadA ATPase mutants [38] to better understand what role binding and hydrolysis play in the mechanism. Both mutant proteins show significant differences in strand invasion and exchange activity relative to each other and the wild-type protein. Total yield of nicked circular DNA produced by K120A with Mg<sup>2+</sup> was approximately two-thirds that generated by wild-type SsoRadA under the same conditions (compare Figure 6B, top panel to Figure 5C, top panel, blue triangles) while joint molecule yields were similar between the two proteins (compare Figure 6B, third panel to Figure 5D top panel, blue triangles). Substituting Mg<sup>2+</sup> with either Ca<sup>2+</sup> or Mn<sup>2+</sup> resulted in an overall reduction of nicked circular DNA product (Figure 6B, top panel). Depletion of ADP (and concurrent increase in ATP) by addition of the ATP regeneration system with Mg<sup>2+</sup> dramatically reduced production of nicked circular products (Figure 6B, second panel). Joint molecule production relative to reactions lacking the regeneration system was also reduced in the presence of Mg<sup>2+</sup> but was increased for Ca<sup>2+</sup> for the timepoints examined (at least 2-fold) and for early Mn<sup>2+</sup> timepoints and 3- to 4-fold for the later time points examined (Figure 6B, compare third and bottom panels).

For the K120R mutant the highest yield of nicked circular product was observed with Mn<sup>2+</sup> and was comparable to that produced by wild-type protein with Ca<sup>2+</sup> and near 50% of that produced by wild-type protein with Mg<sup>2+</sup> at later time points. (compare Figure 6D top panel with Figure 5C bottom panel). Joint molecule yields for this mutant with either Mg<sup>2+</sup> or Mn<sup>2+</sup> in the absence of the ATP regeneration system were similar to those obtained with the wild-type protein with Mg<sup>2+</sup>, with yields near 20–30% of total product at the 60-min timepoint (Figure 6D, third panel and 5D, top panel). This result differs from that seen for the wild-type protein with Mn<sup>2+</sup>, where joint molecule formation is extremely low. Inclusion of the ATP regeneration system increased joint molecule formation by 1.5-fold with Mg<sup>2+</sup> and 2-fold with Ca<sup>2+</sup> but had no apparent effect on nicked circular product (Figure 6D).

Taken together, these results suggest that alteration of the SsoRadA Walker A box GKT motif to either GAT or GRT impairs strand exchange but enhances strand invasion activity when the ATP:ADP ratio is high. At the same time, this high ratio with Mg<sup>2+</sup> as the divalent cofactor has a distinct effect on the K120A mutant, where it impairs joint molecule production and effectively abolishes conversion to nicked circular product. This result is not apparent for the K120R mutant, which is instead largely unaffected by ATP:ADP ratios. Thus, K120A but not K120R may need to bind free ADP to successfully perform strand exchange. This is consistent with the previously reported activities for these mutants, where K120R hydrolyzes ATP more effectively than K120A and may more readily adopt an ADP-bound conformation in the absence of free ADP [38].

## ATP $\gamma$ S inhibits SsoRadA strand exchange in the presence of Mg<sup>2+</sup> but not Ca<sup>2+</sup>

To further probe ATP hydrolysis requirements during strand exchange, we substituted ATP with the slowly hydrolyzed ATP analog ATP $\gamma$ S. Since Mn<sup>2+</sup> produced low levels of nicked-circular product (Figure 5C), we focused only on Mg<sup>2+</sup> and Ca<sup>2+</sup> for these assays. As shown in Figure 7B (top panel), SsoRadA-mediated strand exchange in the presence of Mg<sup>2+</sup> is sensitive to inhibition by ATP $\gamma$ S and reaches nearly complete inhibition of nicked circular dsDNA product formation at equimolar amounts (2.5 mM) of ATP and ATP $\gamma$ S. Joint molecule formation was also inhibited by ATP $\gamma$ S, but the effect was much less extreme (Figure 7B, bottom panel). SsoRadA produced less nicked circular dsDNA product with Ca<sup>2+</sup> and there was no apparent inhibitory effect with ATP $\gamma$ S for either joint molecule formation or completed strand exchange (Figure 7B). To ensure that the presence of additional nucleotide was not responsible for the observed effects, we evaluated SsoRadA strand exchange with ATP concentrations equal to the combined ATP + ATP $\gamma$ S concentrations represented in Figure 7B. As shown in Figure 7D, levels of nicked circular and joint molecule product formation remained constant with increased ATP for both Mg<sup>2+</sup> and Ca<sup>2+</sup> containing conditions. Collectively, these results suggest that SsoRadA-mediated strand exchange is dependent on ATP hydrolysis when Mg<sup>2+</sup> is the divalent cofactor but independent with Ca<sup>2+</sup>. Thus, SsoRadA ATP hydrolysis in the presence of Mg<sup>2+</sup> may provide the necessary filament dynamics to allow strand exchange to proceed while substitution with Ca<sup>2+</sup> could lead to increased filament destabilization, reducing the need for hydrolysis.

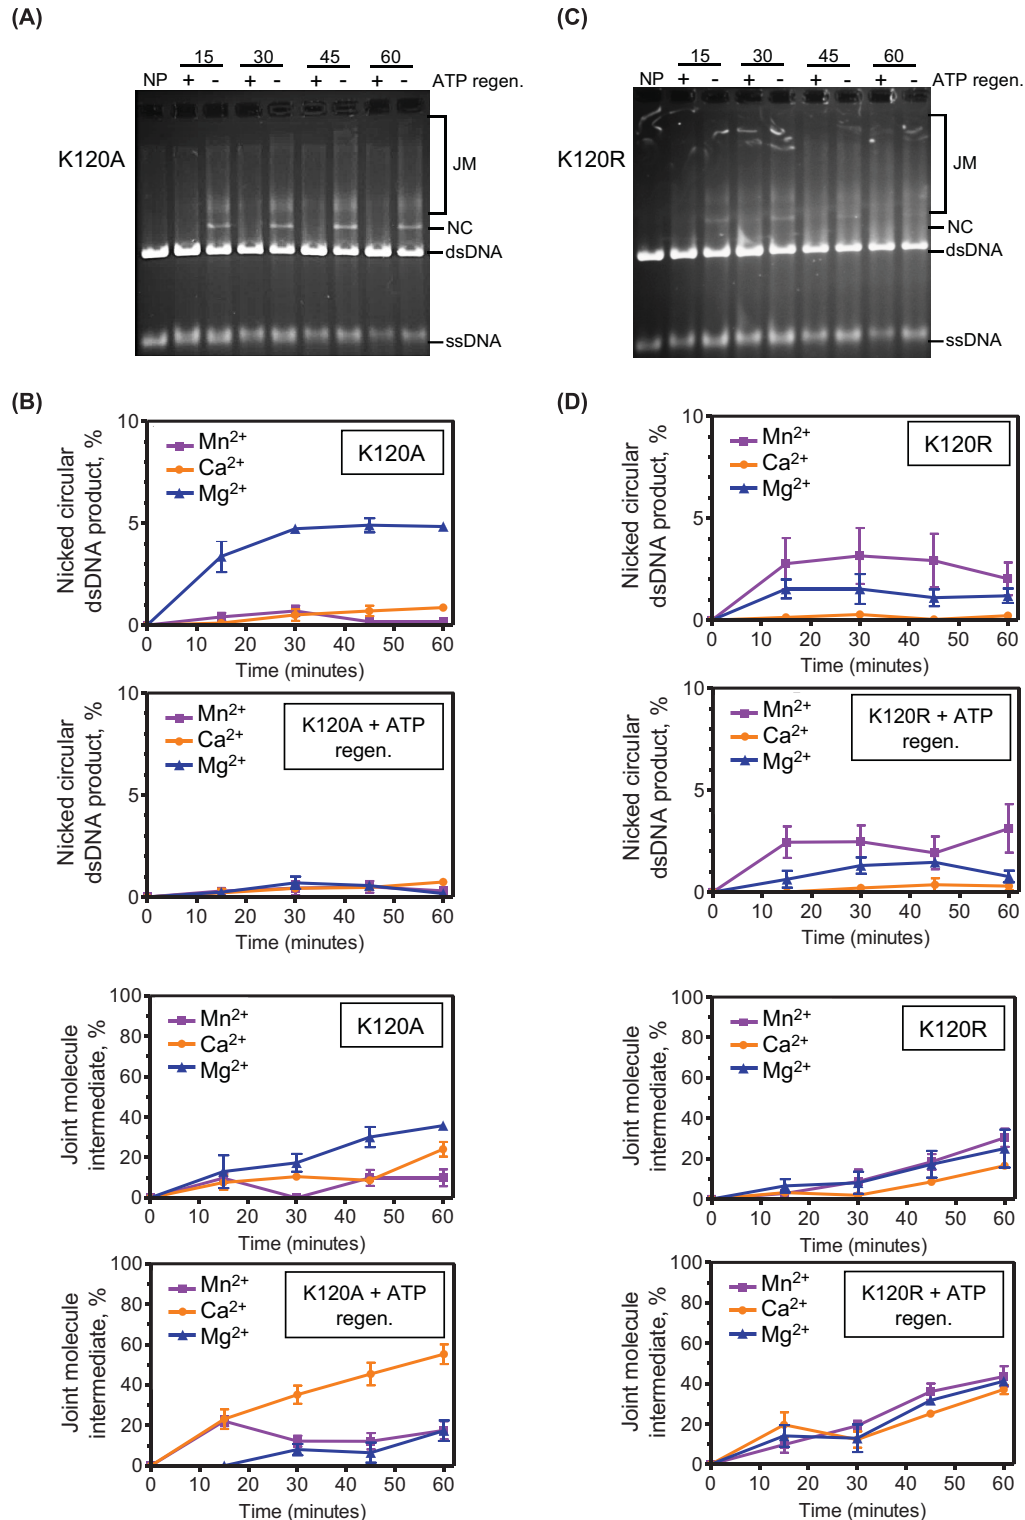

**Figure 6. The K120A mutant is more sensitive to ATP:ADP ratios than the K120R mutant in strand exchange**

Representative gels of strand exchange assays containing the K120A and K120R mutants are presented in panels (A and C). Quantification of NC products in panels (A and C) is shown in the bottom panels of (B and D), respectively. Quantification of JM products from panels (A and C) is shown in the top panels (B and D), respectively. Reactions containing the ATP regeneration system are indicated on the corresponding graphs. Reactions with Mg<sup>2+</sup> are represented with blue triangles, Ca<sup>2+</sup> are orange circles, and Mn<sup>2+</sup> are purple squares. All points are averages of at least three reactions and error bars represent  $\pm$  standard deviation.

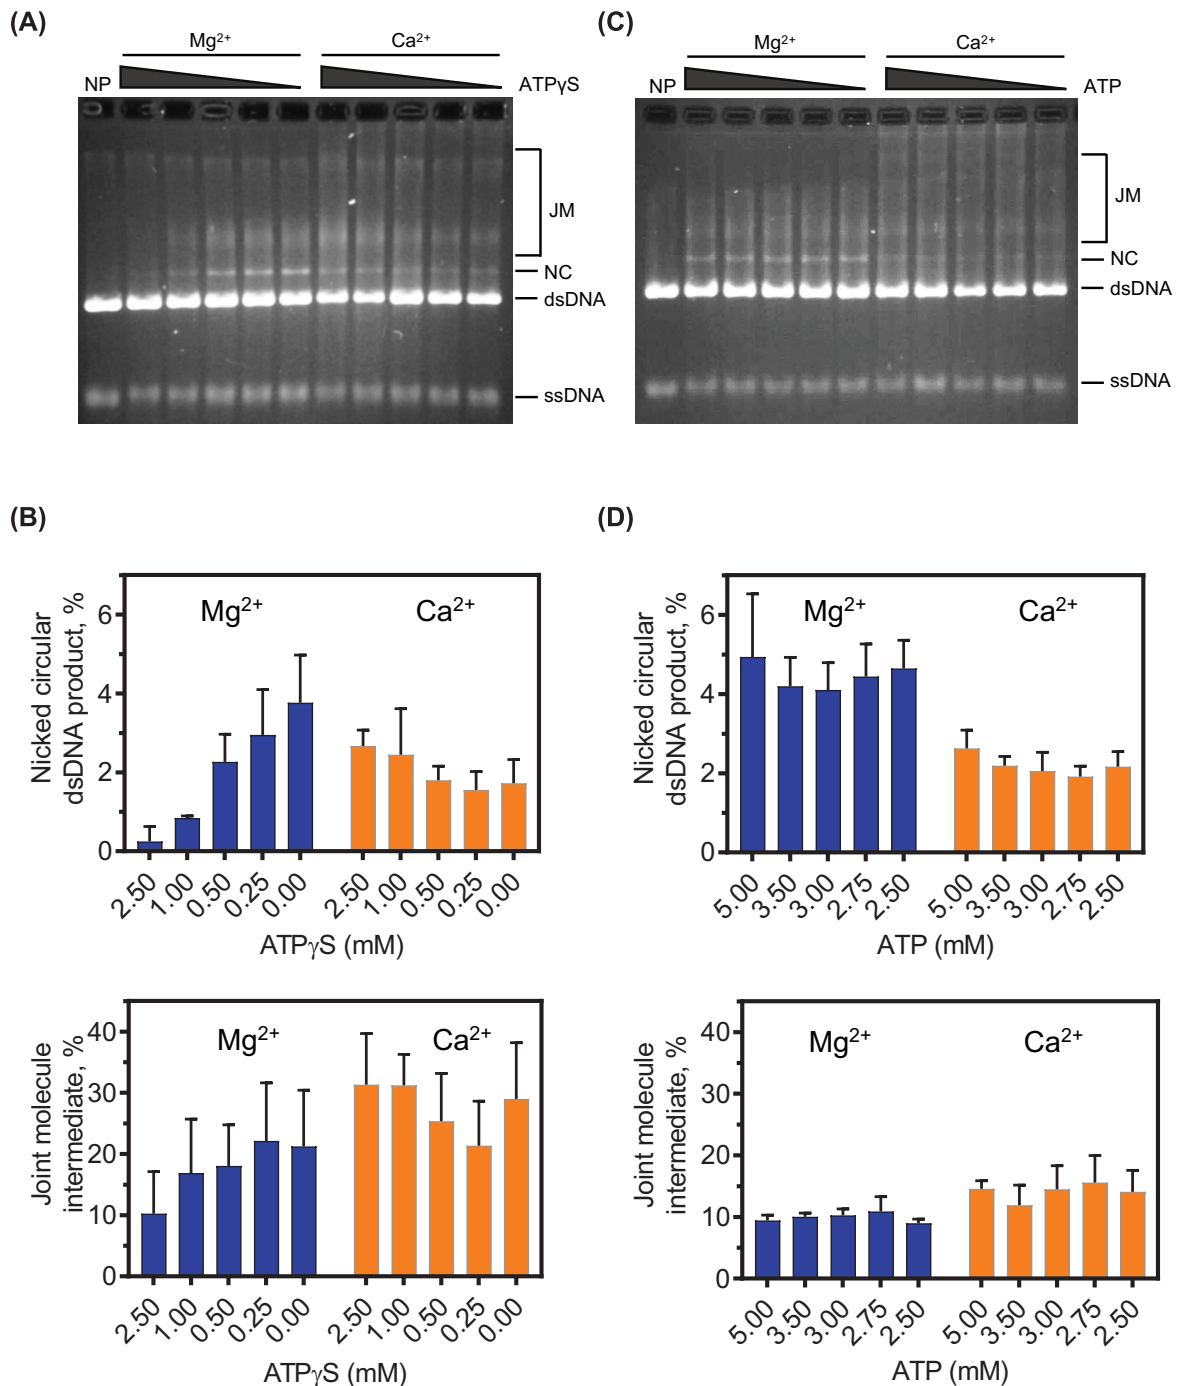

**Figure 7. Ca<sup>2+</sup> protects SsoRadA mediated strand exchange from inhibition by ATP $\gamma$ S**

Thirty-minute endpoint strand exchange reactions were performed to measure the effect of ATP $\gamma$ S on SsoRadA activity with either Mg<sup>2+</sup> or Ca<sup>2+</sup>. **(A)** Representative gel for reactions including ATP $\gamma$ S; concentrations are at 2.5, 1, 0.5, 0.25, and 0 mM from left to right. **(B)** Quantification of nicked circular product and joint molecule formation in the presence of ATP $\gamma$ S. **(C)** Representative gel for control reactions performed in the absence of ATP $\gamma$ S. **(D)** Quantification of nicked circular product and joint molecule formation without ATP $\gamma$ S. For all reactions, ATP is at a concentration of 2.5 mM and in cases where ATP $\gamma$ S is omitted, equivalent concentrations of ATP were used in place of ATP $\gamma$ S. For graphs in panels (B and D), blue bars represent Mg<sup>2+</sup> containing reactions and orange bars represent those with Ca<sup>2+</sup>. All points are averages of a minimum of three replicates and error bars are  $\pm$  standard deviation.

## Divalent cofactors modulate recombinase ssDNA binding and $Mn^{2+}$ reduces ADP inhibition of ATPase activity

To test whether  $Ca^{2+}$  can destabilize the SsoRadA nucleoprotein filament, we determined SsoRadA-ssDNA  $K_D$  values in the presence of all three divalent cofactors with or without ATP using a filter binding assay.  $K_D$  values for  $Mg^{2+}$ ,  $Mn^{2+}$ , and  $Ca^{2+}$  were  $21.3 \text{ nM} \pm 1.6$ ,  $23.1 \text{ nM} \pm 14.4$ , and  $186.8 \text{ nM} \pm 13.2$  ( $\pm$ standard deviation) respectively in the presence of ATP. In the absence of ATP  $K_D$  values were too high to be determined for  $Mg^{2+}$  or  $Ca^{2+}$  as no detectable binding was observed at a ssDNA concentration 10-fold higher than the  $K_D$  values we had obtained in the presence of ATP. A measurable  $K_D$  of  $82.4 \text{ nM} \pm 13.2$  ( $\pm$ standard deviation) was determined for  $Mn^{2+}$ . This result with  $Mn^{2+}$  was very similar to  $Mg^{2+}$  in the presence of ATP but  $Ca^{2+}$  substantially destabilized the SsoRadA-ssDNA interaction. Destabilization could explain tolerance of SsoRadA-mediated strand exchange to ATP $\gamma$ S in the presence of  $Ca^{2+}$ , although additional study is needed to determine if destabilization provides greater flexibility to filaments in the presence of  $Ca^{2+}$  or there is some other benefit conferred by ATP hydrolysis.

We next determined the IC<sub>50</sub>s for both ATP $\gamma$ S and ADP in the presence of  $Mg^{2+}$  or  $Mn^{2+}$ , using the thin layer ATPase assay (Figure 8). The IC<sub>50</sub> of ATP $\gamma$ S for SsoRadA with  $Mg^{2+}$  was 87.8 and 121  $\mu$ M for  $Mn^{2+}$ . As shown in Figure 8B, we obtained IC<sub>50</sub> values of ADP for SsoRadA with  $Mg^{2+}$  of 112.4 and 282  $\mu$ M with  $Mn^{2+}$ . The manganese cation provides SsoRadA greater protection from inhibition by either ADP or ATP $\gamma$ S. This inhibition effect is greater for ADP than ATP $\gamma$ S. These results may in part explain what is observed in the strand invasion assay (Figure 3) where higher yields were obtained for assays containing  $Mn^{2+}$  relative to those with  $Mg^{2+}$ , which are reduced by the addition of the ATP regeneration system to the assay.

## Discussion

In this work, we show the impact of varying divalent metal cofactors for a crenarchaeal RadA protein. We found that substituting  $Mg^{2+}$  with  $Mn^{2+}$  results in ATPase activity inhibition (Figure 2).  $Mn^{2+}$  utilization reduces the stability of one or more SsoRadA ADP-bound states but has little effect on the ATP bound states (Figure 8).  $Mn^{2+}$  also resulted in a substantial improvement in SsoRadA-mediated strand invasion activity (Figure 3). Taken together, these data suggest that  $Mn^{2+}$  enhances strand invasion by abrogating the ADP bound state of SsoRadA, a notion supported by the finding that strand invasion with  $Mg^{2+}$  is enhanced by ADP depletion (via the ATP-regeneration system) but the use of  $Mn^{2+}$  does not show similar increases. Interestingly, the  $Mn^{2+}$  effect does not lead to strand exchange enhancement, since both joint molecule and nicked circular product formation are reduced in the presence of this cofactor (Figure 5). Further structural analysis will be necessary to determine how  $Mn^{2+}$  gives rise to these seemingly opposite effects.

The effect of  $Ca^{2+}$  is much more dramatic than  $Mn^{2+}$  on SsoRadA ATPase activity, resulting in an almost complete abrogation of hydrolysis (Figure 2).  $Ca^{2+}$  destabilizes the association between free SsoRadA and ATP, and between SsoRadA-ATP and ssDNA. Use of  $Ca^{2+}$  in the strand exchange assay leads to a reduction of strand exchange activity, though with a milder effect than that observed for ATP hydrolysis (Figure 5), suggesting that  $Ca^{2+}$  may abrogate the need for ATP hydrolysis during strand exchange. Alteration of ATP hydrolysis through use of ATP $\gamma$ S with  $Ca^{2+}$  results in inhibition resistance (Figure 7), suggesting that  $Ca^{2+}$  substitution obviates a requirement for ATP hydrolysis through potential destabilization of the ATP-bound nucleoprotein filament.

Examination of the Walker box GKT ATPase mutants with different divalent cofactors gives additional insight. Strand invasion mediated by the K120R mutant is not affected by reduction of ADP by inclusion of the ATP regeneration system, but this activity is dramatically enhanced in the same conditions for the K120A mutant (Figure 4). Reducing available ADP has only a mild effect on K120R-mediated strand exchange but almost completely abrogates this activity for K120A with  $Mg^{2+}$  (Figure 6). Together, these results indicate that K120R-mediated processes are more resistant to the presence of ADP, suggesting either the ability to utilize ADP and ATP interchangeably for strand invasion/exchange or a reduction in ADP binding. K120A-mediated processes are instead dramatically affected by ADP depletion, indicating a higher affinity for ADP, which could imply an increased effect of this cofactor on the structure and/or binding ability of the mutant protein.

Previous characterization of crenarchaeal RadA proteins has been primarily focused on nucleoprotein filament structure and interactions with ssDNA, although ATPase activity and *in vitro* recombinase activity using  $Mg^{2+}$  as a cofactor have been examined [6,8,17,21,62,63]. Among the euryarchaea, most work has been with the recombinase proteins derived from *Pyrococcus furiosus* and *M. voltae*. Komori et al. determined that the C-terminal core domain of the *P. furiosus* protein (which is conserved across all archaeal recombinases) is sufficient for strand exchange [64]. Later efforts with this protein have largely focused on humanized versions used to test the interactions of small molecules and BRCA2 with human RAD51 [65–68]. When altered with a humanized ATP binding domain,



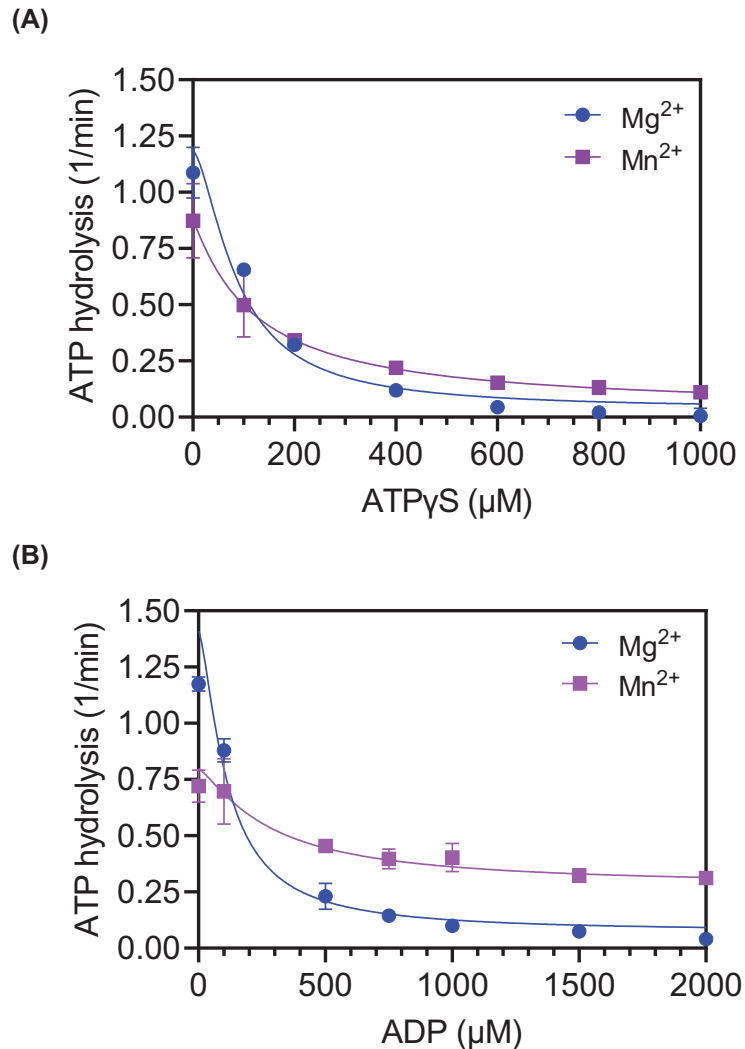

**Figure 8. Inhibition of SsoRadA ATPase activity by ADP and ATP $\gamma$ S**

Fifteen-minute ATPase end points were assessed with increasing amounts of either ATP $\gamma$ S (shown in panel A) or ADP (shown in panel B). Graphed points are the average of three replicates and error bars are  $\pm$  standard deviation. All reactions contained 500  $\mu$ M ATP in addition to the indicated concentration of ATP $\gamma$ S or ADP. Lines shown are the nonlinear regression of inhibitor concentration versus response curves (GraphPad Prism 9). Blue circles represent reactions with Mg $^{2+}$  and purple squares are those with Mn $^{2+}$  and all error bars are standard deviation.

*P. furiosus* RadA was found to exhibit a higher affinity for ADP than for ATP [69]. This outcome differs from our results with the SsoRadA protein, where ATP $\gamma$ S is a more effective inhibitor of SsoRadA ATPase activity than ADP (Figure 8). This incongruity could indicate a variance in cofactor affinity between the two proteins or could be the result of differences between stabilities of other ADP-bound states since the humanized *P. furiosus* RadA protein was evaluated in the absence of ssDNA [69]. Work with the *M. voltae* RadA protein has primarily focused on the effect of K $^{+}$  and Ca $^{2+}$  on activity and associated structure alterations. K $^{+}$  stimulates both ATPase activity and strand exchange; at high concentrations K $^{+}$  eliminates RadA ATPase activity dependence on ssDNA as well as the need for ATP hydrolysis for strand exchange [70,71]. Similarly, Ca $^{2+}$  also eliminates the need for ATP hydrolysis in *M. voltae* RadA recombinase-mediated strand exchange [25]. The underlying cause of these effects relate to a second cation binding location within the ATPase site which allows binding of two divalent cations or a single divalent cation and two K $^{+}$  ions [25,58,71]. This second site can bind Mg $^{2+}$  but is thought to preferentially bind Ca $^{2+}$  [25]. Salt bridges are formed between the cations, Asp-302 of the recombinase, and the phosphates of ATP, resulting in helical geometry changes

and active filament formation [70]. Alignment of the *M. voltae* and *S. solfataricus* RadA proteins [21] reveals that Asp-302 corresponds to Asp-301 in the crenarchaeal protein, suggesting the possibility that the *S. solfataricus* RadA could also bind a second cation (such as  $\text{Ca}^{2+}$  or  $\text{Mn}^{2+}$ ) along with  $\text{Mg}^{2+}$ .

Bacterial RecA proteins have been identified and characterized from many different species with the *E. coli* version most thoroughly examined. Both ATP hydrolysis and RecA-mediated strand exchange are dependent on  $\text{Mg}^{2+}$  and substitution with  $\text{Ca}^{2+}$  does not show the stimulatory effects observed for *M. voltae* RadA [25,47]. However, like the *M. voltae* recombinase, *E. coli* RecA exhibits salt-induced DNA-independent ATPase activity which results in the formation of an active nucleoprotein filament structure [70–73]. When compared to the *S. solfataricus* RadA protein, *E. coli* RecA activity with  $\text{Ca}^{2+}$  is similar and use of this cofactor reduces the rate of ATP hydrolysis (Figure 2) [47]. More recent studies of RecA ATPase activity determined that hydrolysis destabilizes the short strand exchange regions formed during homology search, resulting in increased kinetics for large strand exchange product formation [74]. Our observations of the effect of  $\text{Ca}^{2+}$  on invasion product stability and reduced ATPase activity for wild-type SsoRadA suggests that  $\text{Ca}^{2+}$  may reduce the rate of homology checking leading to persistence of D-loops (Figure 3). We did not, however, find a reduced rate of strand exchange when  $\text{Ca}^{2+}$  was used; this is distinct from results with *E. coli* RecA when ATP $\gamma$ S was used as a method to slow the homology check [74].

The effect of  $\text{Ca}^{2+}$  with human RAD51 has some similarity to that of  $\text{Mn}^{2+}$  with SsoRadA. For the human recombinase,  $\text{Ca}^{2+}$  has been shown to enhance strand invasion and the formation of strand exchange products [34,75]. This effect is believed to occur through a reduction of the amount of RAD51 protein bound to ADP by decreased ATPase activity. Our observations that  $\text{Mn}^{2+}$  enhances SsoRadA strand invasion activity, reduces the SsoRadA ATPase activity, and reduces the ability of ADP to inhibit SsoRadA could be considered comparable (Figures 2, 3, and 8). Additionally,  $\text{Ca}^{2+}$  has been found to improve the organization of the human RAD51 filament and increase its ability to displace RPA from ssDNA [57,76]. Further investigation will be needed to determine whether  $\text{Mn}^{2+}$  has a similar effect on SsoRadA filament organization and SSB displacement. Non-canonical cations other than  $\text{Mg}^{2+}$  alter the function of RecA family recombinases in all domains of life. For the SsoRadA protein and these alternative cations, ATPase activity and strand exchange are reduced while strand invasion is increased, which is distinct from the behavior of the *M. voltae* RadA protein. There is also a distinct difference when compared with *E. coli* RecA, except for reduced ATPase activity with alternate cations. Overall, the SsoRadA recombinase shows the most similarity to human RAD51 with  $\text{Ca}^{2+}$  for both strand invasion and exchange. This may be due to the similarities between DNA metabolism in archaea and eukaryotes. The effect of  $\text{Mn}^{2+}$  on the *S. solfataricus* RadA protein could result from the minerals present in the unusual environmental niche inhabited by this archaeon. While the overall effects of the non-canonical cations with SsoRadA examined in this work do reveal some similarities to previously investigated recombinases, the extent of activity alterations and preferred cofactor usage is unique to the *S. solfataricus* protein.

## Data Availability

All supporting data are included within the main article.

## Competing Interests

The authors declare that there are no competing interests associated with the manuscript.

## Funding

This work was supported by the National Institutes of Health Protein Biotechnology Training Program [grant number T32GM083864]; and the National Science Foundation [MCB-0951125].

## CRedit Author Contribution

**Corey J. Knadler:** Conceptualization, Resources, Data curation, Formal analysis, Supervision, Funding acquisition, Validation, Investigation, Visualization, Methodology, Writing—original draft, Project administration, Writing—review & editing. **William J. Graham:** Conceptualization, Formal analysis, Validation, Investigation, Visualization, Methodology, Writing—original draft, Writing—review & editing. **Michael L. Rolfmeier:** Conceptualization, Formal analysis, Supervision, Validation, Investigation, Visualization, Methodology, Writing—original draft, Writing—review & editing. **Cynthia Haseltine:** Conceptualization, Resources, Data curation, Formal analysis, Supervision, Funding acquisition, Validation, Investigation, Visualization, Methodology, Writing—original draft, Project administration, Writing—review & editing.

## Acknowledgements

We thank members of the Haseltine laboratory Marguerite Smith, Brianne Jones, and Jordyn Meekma for critical reading of the manuscript. We would like to especially thank Ralph Yount for helpful discussions, thoughtful suggestions, and tremendously insightful observations about ATP analog interactions with the SsoRadA recombinase.

## Abbreviations

HR, homologous recombination; TLC, thin layer chromatography; *Tm*LDH, *Thermotoga maritima* lactate dehydrogenase; *Tm*PK, *Thermotoga maritima* pyruvate kinase.

## References

- Mao, D. and Grogan, D.W. (2017) How a genetically stable extremophile evolves: modes of genome diversification in the archaeon *Sulfolobus acidocaldarius*. *J. Bacteriol.* **199**, <https://doi.org/10.1128/JB.00177-17>
- Shapiro, B.J., Leducq, J.B. and Mallet, J. (2016) What is speciation? *PLoS Genet.* **12**, e1005860, <https://doi.org/10.1371/journal.pgen.1005860>
- Krause, D.J., Didelot, X., Cadillo-Quiroz, H. and Whitaker, R.J. (2014) Recombination shapes genome architecture in an organism from the archaeal domain. *Genome Biol. Evol.* **6**, 170–178, <https://doi.org/10.1093/gbe/evu003>
- San Filippo, J., Sung, P. and Klein, H. (2008) Mechanism of eukaryotic homologous recombination. *Annu. Rev. Biochem.* **77**, 229–257, <https://doi.org/10.1146/annurev.biochem.77.061306.125255>
- Takahashi, M. and Norden, B. (1994) Structure of RecA-DNA complex and mechanism of DNA strand exchange reaction in homologous recombination. *Adv. Biophys.* **30**, 1–35, [https://doi.org/10.1016/0065-227X\(94\)90009-4](https://doi.org/10.1016/0065-227X(94)90009-4)
- Seitz, E.M., Brockman, J.P., Sandler, S.J., Clark, A.J. and Kowalczykowski, S.C. (1998) RadA protein is an archaeal RecA protein homolog that catalyzes DNA strand exchange. *Genes & Development* **12**, 1248–1253, <https://doi.org/10.1101/gad.12.9.1248>
- Sung, P. (1994) Catalysis of ATP-dependent homologous DNA pairing and strand exchange by yeast RAD51 protein. *Science* **265**, 1241–1243, <https://doi.org/10.1126/science.8066464>
- Yang, S., Yu, X., Seitz, E.M., Kowalczykowski, S.C. and Egelman, E.H. (2001) Archaeal RadA protein binds DNA as both helical filaments and octameric rings. *J. Mol. Biol.* **314**, 1077–1085, <https://doi.org/10.1006/jmbi.2000.5213>
- McIlwraith, M.J., Hall, D.R., Stasiak, A.Z., Stasiak, A., Wigley, D.B. and West, S.C. (2001) RadA protein from *Archaeoglobus fulgidus* forms rings, nucleoprotein filaments and catalyses homologous recombination. *Nucleic Acids Res.* **29**, 4509–4517, <https://doi.org/10.1093/nar/29.22.4509>
- Hegner, M., Smith, S.B. and Bustamante, C. (1999) Polymerization and mechanical properties of single RecA-DNA filaments. *Proc. Natl. Acad. Sci.* **96**, 10109–10114, <https://doi.org/10.1073/pnas.96.18.10109>
- Ellouze, C., Kim, H.K., Maeshima, K., Tuite, E., Morimatsu, K., Horii, T. et al. (1997) Nucleotide cofactor-dependent structural change of *Xenopus laevis* Rad51 protein filament detected by small-angle neutron scattering measurements in solution. *Biochemistry* **36**, 13524–13529, <https://doi.org/10.1021/bi971000n>
- Ogawa, T., Yu, X., Shinohara, A. and Egelman, E.H. (1993) Similarity of the yeast RAD51 filament to the bacterial RecA filament. *Science* **259**, 1896–1899, <https://doi.org/10.1126/science.8456314>
- Zlotnick, A., Mitchell, R.S. and Brenner, S.L. (1990) recA protein filaments bind two molecules of single-stranded DNA with off rates regulated by nucleotide cofactor. *J. Biol. Chem.* **265**, 17050–17054, [https://doi.org/10.1016/S0021-9258\(17\)44867-8](https://doi.org/10.1016/S0021-9258(17)44867-8)
- Flory, J. and Radding, C.M. (1982) Visualization of recA protein and its association with DNA: a priming effect of single-strand-binding protein. *Cell* **28**, 747–756, [https://doi.org/10.1016/0092-8674\(82\)90054-X](https://doi.org/10.1016/0092-8674(82)90054-X)
- Dunn, K., Chrysogelos, S. and Griffith, J. (1982) Electron microscopic visualization of recA-DNA filaments: evidence for a cyclic extension of duplex DNA. *Cell* **28**, 757–765, [https://doi.org/10.1016/0092-8674\(82\)90055-1](https://doi.org/10.1016/0092-8674(82)90055-1)
- Chang, Y.W., Ko, T.P., Lee, C.D., Chang, Y.C., Lin, K.A., Chang, C.S. et al. (2009) Three new structures of left-handed RADA helical filaments: structural flexibility of N-terminal domain is critical for recombinase activity. *PLoS ONE* **4**, e4890, <https://doi.org/10.1371/journal.pone.0004890>
- Ariza, A., Richard, D.J., White, M.F. and Bond, C.S. (2005) Conformational flexibility revealed by the crystal structure of a crenarchaeal RadA. *Nucleic Acids Res.* **33**, 1465–1473, <https://doi.org/10.1093/nar/gki288>
- Brouwer, I., Moschetti, T., Candelli, A., Garcin, E.B., Modesti, M., Pellegrini, L. et al. (2018) Two distinct conformational states define the interaction of human RAD51-ATP with single-stranded DNA. *EMBO J.* **37**, <https://doi.org/10.15252/embj.201798162>
- Lee, A.J., Endo, M., Hobbs, J.K. and Walti, C. (2018) Direct single-molecule observation of mode and geometry of RecA-mediated homology search. *ACS Nano* **12**, 272–278, <https://doi.org/10.1021/acsnano.7b06208>
- van Loenhout, M.T., van der Heijden, T., Kanaar, R., Wyman, C. and Dekker, C. (2009) Dynamics of RecA filaments on single-stranded DNA. *Nucleic Acids Res.* **37**, 4089–4099, <https://doi.org/10.1093/nar/gkp326>
- Chen, L.T., Ko, T.P., Chang, Y.C., Lin, K.A., Chang, C.S., Wang, A.H. et al. (2007) Crystal structure of the left-handed archaeal RadA helical filament: identification of a functional motif for controlling quaternary structures and enzymatic functions of RecA family proteins. *Nucleic Acids Res.* **35**, 1787–1801, <https://doi.org/10.1093/nar/gkl1131>
- Anand, R., Beach, A., Li, K. and Haber, J. (2017) Rad51-mediated double-strand break repair and mismatch correction of divergent substrates. *Nature* **544**, 377–380, <https://doi.org/10.1038/nature22046>
- Zhang, Y.W., Nong, D.G., Dou, S.X., Li, W., Yan, Y., Xi, X.G. et al. (2016) Iterative homology checking and non-uniform stepping during RecA-mediated strand exchange. *Biochem. Biophys. Res. Commun.* **478**, 1153–1157, <https://doi.org/10.1016/j.bbrc.2016.08.084>

- 24 Zhao, B., Zhang, D., Li, C., Yuan, Z., Yu, F., Zhong, S. et al. (2017) ATPase activity tightly regulates RecA nucleofilaments to promote homologous recombination. *Cell Discov.* **3**, 16053, <https://doi.org/10.1038/celldisc.2016.53>
- 25 Qian, X., He, Y., Ma, X., Fodje, M.N., Grochulski, P. and Luo, Y. (2006) Calcium stiffens archaeal Rad51 recombinase from *Methanococcus voltae* for homologous recombination. *J. Biol. Chem.* **281**, 39380–39387, <https://doi.org/10.1074/jbc.M607785200>
- 26 Tomblin, G. and Fishel, R. (2002) Biochemical characterization of the human RAD51 protein. I. ATP hydrolysis. *J. Biol. Chem.* **277**, 14417–14425, <https://doi.org/10.1074/jbc.M109915200>
- 27 Datta, S., Prabu, M.M., Vaze, M.B., Ganesh, N., Chandra, N.R., Muniyappa, K. et al. (2000) Crystal structures of *Mycobacterium tuberculosis* RecA and its complex with ADP-AIF: implications for decreased ATPase activity and molecular aggregation. *Nucleic Acids Res.* **28**, 4964–4973, <https://doi.org/10.1093/nar/28.24.4964>
- 28 Sugiyama, T., Zaitseva, E.M. and Kowalczykowski, S.C. (1997) A single-stranded DNA-binding protein is needed for efficient presynaptic complex formation by the *Saccharomyces cerevisiae* Rad51 protein. *J. Biol. Chem.* **272**, 7940–7945, <https://doi.org/10.1074/jbc.272.12.7940>
- 29 Shibata, T., DasGupta, C., Cunningham, R.P. and Radding, C.M. (1979) Purified *Escherichia coli* recA protein catalyzes homologous pairing of superhelical DNA and single-stranded fragments. *Proc. Natl Acad. Sci.* **76**, 1638–1642, <https://doi.org/10.1073/pnas.76.4.1638>
- 30 Gataulin, D.V., Carey, J.N., Li, J., Shah, P., Grubb, J.T. and Bishop, D.K. (2018) The ATPase activity of *E. coli* RecA prevents accumulation of toxic complexes formed by erroneous binding to undamaged double stranded DNA. *Nucleic Acids Res.* **46**, 9510–9523, <https://doi.org/10.1093/nar/gky748>
- 31 Kim, S.H., Ahn, T., Cui, T.J., Chauhan, S., Sung, J., Joo, C. et al. (2017) RecA filament maintains structural integrity using ATP-driven internal dynamics. *Sci. Adv.* **3**, e1700676, <https://doi.org/10.1126/sciadv.1700676>
- 32 Menetski, J.P., Bear, D.G. and Kowalczykowski, S.C. (1990) Stable DNA heteroduplex formation catalyzed by the *Escherichia coli* RecA protein in the absence of ATP hydrolysis. *Proc. Natl Acad. Sci.* **87**, 21–25, <https://doi.org/10.1073/pnas.87.1.21>
- 33 Li, Y., He, Y. and Luo, Y. (2009) Conservation of a conformational switch in RadA recombinase from *Methanococcus maripaludis*. *Acta Crystallogr. Sect. D* **65**, 602–610, <https://doi.org/10.1107/S0907444909011871>
- 34 Bugreev, D.V. and Mazin, A.V. (2004) Ca<sup>2+</sup> activates human homologous recombination protein Rad51 by modulating its ATPase activity. *Proc. Natl Acad. Sci.* **101**, 9988–9993, <https://doi.org/10.1073/pnas.0402105101>
- 35 Kowalczykowski, S.C. and Krupp, R.A. (1995) DNA-strand exchange promoted by RecA protein in the absence of ATP: implications for the mechanism of energy transduction in protein-promoted nucleic acid transactions. *Proc. Natl Acad. Sci.* **92**, 3478–3482, <https://doi.org/10.1073/pnas.92.8.3478>
- 36 Robertson, R.B., Moses, D.N., Kwon, Y., Chan, P., Zhao, W., Chi, P. et al. (2009) Visualizing the disassembly of *S. cerevisiae* Rad51 nucleoprotein filaments. *J. Mol. Biol.* **388**, 703–720, <https://doi.org/10.1016/j.jmb.2009.03.049>
- 37 McEntee, K., Weinstock, G.M. and Lehman, I.R. (1981) Binding of the recA protein of *Escherichia coli* to single- and double-stranded DNA. *J. Biol. Chem.* **256**, 8835–8844, [https://doi.org/10.1016/S0021-9258\(19\)68921-0](https://doi.org/10.1016/S0021-9258(19)68921-0)
- 38 Graham, 5th, W.J., Rolfsmeier, M.L. and Haseltine, C.A. (2013) An archaeal RadA paralog influences presynaptic filament formation. *DNA Repair (Amst.)* **12**, 403–413, <https://doi.org/10.1016/j.dnarep.2013.03.003>
- 39 Amunugama, R., He, Y., Willcox, S., Forties, R.A., Shim, K.S., Bundschuh, R. et al. (2012) RAD51 protein ATP cap regulates nucleoprotein filament stability. *J. Biol. Chem.* **287**, 8724–8736, <https://doi.org/10.1074/jbc.M111.239426>
- 40 Lee, J.Y., Qi, Z. and Greene, E.C. (2016) ATP hydrolysis promotes duplex DNA release by the RecA presynaptic complex. *J. Biol. Chem.* **291**, 22218–22230, <https://doi.org/10.1074/jbc.M116.740563>
- 41 Lusetti, S.L., Voloshin, O.N., Inman, R.B., Camerini-Otero, R.D. and Cox, M.M. (2004) The DinI protein stabilizes RecA protein filaments. *J. Biol. Chem.* **279**, 30037–30046, <https://doi.org/10.1074/jbc.M403064200>
- 42 Lee, J.W. and Cox, M.M. (1990) Inhibition of recA protein promoted ATP hydrolysis. 1. ATP gamma S and ADP are antagonistic inhibitors. *Biochemistry* **29**, 7666–7676, <https://doi.org/10.1021/bi00485a016>
- 43 Cox, M.M., Soltis, D.A., Lehman, I.R., DeBrosse, C. and Benkovic, S.J. (1983) ADP-mediated dissociation of stable complexes of recA protein and single-stranded DNA. *J. Biol. Chem.* **258**, 2586–2592, [https://doi.org/10.1016/S0021-9258\(18\)32966-1](https://doi.org/10.1016/S0021-9258(18)32966-1)
- 44 Qian, X., Wu, Y., He, Y. and Luo, Y. (2005) Crystal structure of *Methanococcus voltae* RadA in complex with ADP: hydrolysis-induced conformational change. *Biochemistry* **44**, 13753–13761, <https://doi.org/10.1021/bi051222i>
- 45 Hilario, J., Amitani, I., Baskin, R.J. and Kowalczykowski, S.C. (2009) Direct imaging of human Rad51 nucleoprotein dynamics on individual DNA molecules. *Proc. Natl Acad. Sci.* **106**, 361–368, <https://doi.org/10.1073/pnas.0811965106>
- 46 Ellouze, C., Selmane, T., Kim, H.K., Tuite, E., Norden, B., Mortensen, K. et al. (1999) Difference between active and inactive nucleotide cofactors in the effect on the DNA binding and the helical structure of RecA filament dissociation of RecA–DNA complex by inactive nucleotides. *Eur. J. Biochem./FEBS* **262**, 88–94
- 47 Menetski, J.P., Varghese, A. and Kowalczykowski, S.C. (1988) Properties of the high-affinity single-stranded DNA binding state of the *Escherichia coli* recA protein. *Biochemistry* **27**, 1205–1212, <https://doi.org/10.1021/bi00404a021>
- 48 Bugreev, D.V., Golub, E.I., Stasiak, A.Z., Stasiak, A. and Mazin, A.V. (2005) Activation of human meiosis-specific recombinase Dmc1 by Ca<sup>2+</sup>. *J. Biol. Chem.* **280**, 26886–26895, <https://doi.org/10.1074/jbc.M502248200>
- 49 Graham, 5th, W.J. and Haseltine, C.A. (2013) A recombinase paralog from the hyperthermophilic crenarchaeon *Sulfolobus solfataricus* enhances SsoRadA ssDNA binding and strand displacement. *Gene* **515**, 128–139, <https://doi.org/10.1016/j.gene.2012.11.010>
- 50 Rolfsmeier, M.L. and Haseltine, C.A. (2010) The single-stranded DNA binding protein of *Sulfolobus solfataricus* acts in the presynaptic step of homologous recombination. *J. Mol. Biol.* **397**, 31–45, <https://doi.org/10.1016/j.jmb.2010.01.004>
- 51 Haseltine, C.A. and Kowalczykowski, S.C. (2009) An archaeal Rad54 protein remodels DNA and stimulates DNA strand exchange by RadA. *Nucleic Acids Res.* **37**, 2757–2770, <https://doi.org/10.1093/nar/gkp068>
- 52 Cheng, Y. and Prusoff, W.H. (1973) Relationship between the inhibition constant (K<sub>1</sub>) and the concentration of inhibitor which causes 50 per cent inhibition (I<sub>50</sub>) of an enzymatic reaction. *Biochem. Pharmacol.* **22**, 3099–3108, [https://doi.org/10.1016/0006-2952\(73\)90196-2](https://doi.org/10.1016/0006-2952(73)90196-2)



- 53 Rolfsmeier, M.L. and Haseltine, C.A. (2018) The RadA recombinase and paralogs of the hyperthermophilic archaeon *Sulfolobus solfataricus*. *Methods Enzymol.* **600**, 255–284, <https://doi.org/10.1016/bs.mie.2017.12.009>
- 54 Cox, M.M. (1990) Binding of two DNA molecules at once: The recA protein. In *The biology of nonspecific DNA-protein interactions* (Revzin, A., ed.), pp. 171–196, CRC Press, Boca Raton, FL
- 55 Shibata, T., Ohtani, T., Iwabuchi, M. and Ando, T. (1982) D-loop cycle. A circular reaction sequence which comprises formation and dissociation of D-loops and inactivation and reactivation of superhelical closed circular DNA promoted by recA protein of *Escherichia coli*. *J. Biol. Chem.* **257**, 13981–13986, [https://doi.org/10.1016/S0021-9258\(19\)45330-1](https://doi.org/10.1016/S0021-9258(19)45330-1)
- 56 Soltis, D.A. and Lehman, I.R. (1983) recA protein promoted DNA strand exchange. *J. Biol. Chem.* **258**, 6073–6077, [https://doi.org/10.1016/S0021-9258\(18\)32374-3](https://doi.org/10.1016/S0021-9258(18)32374-3)
- 57 Fornander, L.H., Frykholm, K., Reymer, A., Renodon-Corniere, A., Takahashi, M. and Norden, B. (2012) Ca<sup>2+</sup> improves organization of single-stranded DNA bases in human Rad51 filament, explaining stimulatory effect on gene recombination. *Nucleic Acids Res.* **40**, 4904–4913, <https://doi.org/10.1093/nar/gks140>
- 58 Qian, X., He, Y. and Luo, Y. (2007) Binding of a second magnesium is required for ATPase activity of RadA from *Methanococcus voltae*. *Biochemistry* **46**, 5855–5863, <https://doi.org/10.1021/bi6024098>
- 59 Walker, J.E., Saraste, M., Runswick, M.J. and Gay, N.J. (1982) Distantly related sequences in the alpha- and beta-subunits of ATP synthase, myosin, kinases and other ATP-requiring enzymes and a common nucleotide binding fold. *EMBO J.* **1**, 945–951, <https://doi.org/10.1002/j.1460-2075.1982.tb01276.x>
- 60 Story, R.M., Weber, I.T. and Steitz, T.A. (1992) The structure of the *E. coli* recA protein monomer and polymer. *Nature* **355**, 318–325, <https://doi.org/10.1038/355318a0>
- 61 Knadler, C., Rolfsmeier, M., Vallejo, A. and Haseltine, C. (2020) Characterization of an archaeal recombinase paralog that exhibits novel anti-recombinase activity. *Mutat. Res.* **821**, 111703, <https://doi.org/10.1016/j.mrfmmm.2020.111703>
- 62 Naoe, C., Tsunoda, M. and Nakamura, K.T. (2004) Structural study of the archaeal homologous recombinant protein complexed with DNA fragments. *Nucleic Acids Symp. Ser. (Oxf.)* 115–116, <https://doi.org/10.1093/nass/48.1.115>
- 63 Kil, Y.V., Baitin, D.M., Masui, R., Bonch-Osmolovskaya, E.A., Kuramitsu, S. and Lanzov, V.A. (2000) Efficient strand transfer by the RadA recombinase from the hyperthermophilic archaeon *Desulfurococcus amylolyticus*. *J. Bacteriol.* **182**, 130–134, <https://doi.org/10.1128/JB.182.1.130-134.2000>
- 64 Komori, K., Miyata, T., Daiyasu, H., Toh, H. and Shinagawa, H. (2000) Ishino A. Y. Domain analysis of an archaeal RadA protein for the strand exchange activity. *J. Biol. Chem.* **275**, 33791–33797, <https://doi.org/10.1074/jbc.M004556200>
- 65 Scott, D.E., Coyne, A.G., Venkitaraman, A., Blundell, T.L., Abell, C. and Hyvonen, M. (2015) Small-molecule inhibitors that target protein-protein interactions in the RAD51 family of recombinases. *Chem. Med. Chem.* **10**, 296–303, <https://doi.org/10.1002/cmdc.201402428>
- 66 Scott, D.E., Francis-Newton, N.J., Marsh, M.E., Coyne, A.G., Fischer, G., Moschetti, T. et al. (2021) A small-molecule inhibitor of the BRCA2-RAD51 interaction modulates RAD51 assembly and potentiates DNA damage-induced cell death. *Cell Chem. Biol.* **28**, 835e5–847e5, <https://doi.org/10.1016/j.chembiol.2021.02.006>
- 67 Moschetti, T., Sharpe, T., Fischer, G., Marsh, M.E., Ng, H.K., Morgan, M. et al. (2016) Engineering archeal surrogate systems for the development of protein-protein interaction inhibitors against human RAD51. *J. Mol. Biol.* **428**, 4589–4607, <https://doi.org/10.1016/j.jmb.2016.10.009>
- 68 Scott, D.E., Marsh, M., Blundell, T.L., Abell, C. and Hyvonen, M. (2016) Structure-activity relationship of the peptide binding-motif mediating the BRCA2:RAD51 protein-protein interaction. *FEBS Lett.* **590**, 1094–1102, <https://doi.org/10.1002/1873-3468.12139>
- 69 Marsh, M.E., Scott, D.E., Ehebauer, M.T., Abell, C., Blundell, T.L. and Hyvonen, M. (2016) ATP half-sites in RadA and RAD51 recombinases bind nucleotides. *FEBS Open. Bio.* **6**, 372–385, <https://doi.org/10.1002/2211-5463.12052>
- 70 Qian, X., He, Y., Wu, Y. and Luo, Y. (2006) Asp302 determines potassium dependence of a RadA recombinase from *Methanococcus voltae*. *J. Mol. Biol.* **360**, 537–547, <https://doi.org/10.1016/j.jmb.2006.05.058>
- 71 Wu, Y., Qian, X., He, Y., Moya, I.A. and Luo, Y. (2005) Crystal structure of an ATPase-active form of Rad51 homolog from *Methanococcus voltae*. Insights into potassium dependence. *J. Biol. Chem.* **280**, 722–728, <https://doi.org/10.1074/jbc.M411093200>
- 72 Pugh, B.F. and Cox, M.M. (1988) High salt activation of recA protein ATPase in the absence of DNA. *J. Biol. Chem.* **263**, 76–83, [https://doi.org/10.1016/S0021-9258\(19\)57359-8](https://doi.org/10.1016/S0021-9258(19)57359-8)
- 73 DiCapua, E., Ruigrok, R.W. and Timmins, P.A. (1990) Activation of recA protein: the salt-induced structural transition. *J. Struct. Biol.* **104**, 91–96, [https://doi.org/10.1016/1047-8477\(90\)90062-H](https://doi.org/10.1016/1047-8477(90)90062-H)
- 74 Danilowicz, C., Hermans, L., Coljee, V., Prevost, C. and Prentiss, M. (2017) ATP hydrolysis provides functions that promote rejection of pairings between different copies of long repeated sequences. *Nucleic Acids Res.* **45**, 8448–8462, <https://doi.org/10.1093/nar/gkx582>
- 75 Spirek, M., Mlcouskova, J., Belan, O., Gyimesi, M., Harami, G.M., Molnar, E. et al. (2018) Human RAD51 rapidly forms intrinsically dynamic nucleoprotein filaments modulated by nucleotide binding state. *Nucleic Acids Res.* **46**, 3967–3980, <https://doi.org/10.1093/nar/gky111>
- 76 Ma, C.J., Gibb, B., Kwon, Y., Sung, P. and Greene, E.C. (2017) Protein dynamics of human RPA and RAD51 on ssDNA during assembly and disassembly of the RAD51 filament. *Nucleic Acids Res.* **45**, 749–761, <https://doi.org/10.1093/nar/gkw1125>
